# Supplementary material for: Structural and functional dissection of the DH and PH domains of oncogenic Bcr-Abl tyrosine kinase
Source: Nat Commun. 2017 Dec 13;8:2101. doi: 10.1038/s41467-017-02313-6 (PMC5727386; doi:10.1038/s41467-017-02313-6)
Supplement: Supplementary file 4 — Supplementary Data 1 [file 41467_2017_2313_MOESM4_ESM.xlsx]

## Sheet: StrepHA-tag_DHPH
Protein names	Gene names	Accession Number	Molecular Weight	DHPH wt - unique peptide count	GFP - unique peptide count	Shc-1 - unique peptide count
DH-PH Bcr-Abl			67 kDa	83	1	9
Acetyl-CoA carboxylase 1	Acaca	Q13085	266 kDa	83	38	96
Keratin, type II cytoskeletal 1	Krt1	P04264	66 kDa	38	39	38
Keratin, type I cytoskeletal 10	Krt10	P13645	59 kDa	37	28	34
Heat shock cognate 71 kDa protein	Hspa8	P11142	71 kDa	29	11	27
Keratin, type II cytoskeletal 2 epidermal	Krt2	P35908	65 kDa	29	22	31
Keratin, type I cytoskeletal 9	Krt9	P35527	62 kDa	27	37	32
Tubulin beta chain	Tubb	P07437	50 kDa	18	11	12
Heat shock 70 kDa protein 1A/1B	Hspa1a	P08107	70 kDa	10	1	13
Keratin, type II cytoskeletal 5	Krt5	P13647	62 kDa	10	10	13
Heat shock protein HSP 90-beta	Hsp90ab1	P08238	83 kDa	9	10	1
Tubulin alpha chain	Tuba1c	F5H5D3	58 kDa	9	9	6
Stress-70 protein, mitochondrial	Hspa9	P38646	74 kDa	9	6	12
Keratin, type I cytoskeletal 16	Krt16	P08779	51 kDa	8	10	11
Keratin, type I cytoskeletal 14	Krt14	P02533	52 kDa	6	6	7
Peroxiredoxin-1	Prdx1	Q06830	22 kDa	5	3	3
Keratin, type II cytoskeletal 6A	Krt6a	P02538	60 kDa	5	14	5
Elongation factor 1-alpha 1	Eef1a1	P68104	50 kDa	4	5	4
Keratin, type II cuticular Hb3	Krt83	P78385	54 kDa	3		0
40S ribosomal protein S25	Rps25	P62851	14 kDa	3	1	0
Keratinocyte proline-rich protein	Kprp	Q5T749	64 kDa	3	1	3
Hornerin	Hrnr	Q86YZ3	282 kDa	3	3	4
Active breakpoint cluster region-related protein	Abr	B7Z683	74 kDa	3
40S ribosomal protein S18	Rps18	P62269	18 kDa	3	2
Apoptosis-inducing factor 1, mitochondrial	Aifm1	O95831	67 kDa	2	0	0
ADP/ATP translocase 2	Slc25a5	P05141	33 kDa	2		0
Keratin, type II cytoskeletal 74	Krt74	F8W1S1	59 kDa	2	2	1
40S ribosomal protein S3	Rps3	P23396-2	28 kDa	2	4	1
Elongation factor Tu, mitochondrial	Tufm	P49411	50 kDa	2	1	1
Dermcidin	Dcd	P81605	11 kDa	2	2	2
Trypsin-1	Prss1	E7EQ64	28 kDa	2	0	2
78 kDa glucose-regulated protein	Hspa5	P11021	72 kDa	2	0	5
Serum albumin	Alb	P02768	69 kDa	2	6	6
60S ribosomal protein L22	Rpl22	K7ELC4	9 kDa	2	1
Protein S100-A8	S100a8	P05109	11 kDa	2
Histone H1.3	Hist1h1d	P16402	22 kDa	1	2	1
CASP8-associated protein 2	Casp8ap2	Q9UKL3	223 kDa	1		2
Probable ATP-dependent RNA helicase DDX5	Ddx5	B4DLW8	61 kDa	1	2	2
Heterogeneous nuclear ribonucleoprotein H	Hnrnph1	G8JLB6	51 kDa	1	4	2
Actin, cytoplasmic 1	Actb	P60709	42 kDa	1	9	3
Desmoglein-1	Dsg1	Q02413	114 kDa	1	1	3
Titin	Ttn	Q8WZ42-4	3716 kDa	1	1	3
Leucine-rich repeat serine/threonine-protein kinase 1	Lrrk1	J3KN98	225 kDa	1	0	13
Cofilin-1	Cfl1	E9PP50	18 kDa	1
Hemoglobin subunit alpha	Hba1	P69905	15 kDa	1	4
Heterogeneous nuclear ribonucleoprotein U	Hnrnpu	Q00839	91 kDa	1
Keratin, type I cytoskeletal 17	Krt17	Q04695	48 kDa	1	1
14-3-3 protein gamma	Ywhag	P61981	28 kDa	1
14-3-3 protein theta	Ywhaq	E9PG15	17 kDa	1
14-3-3 protein zeta/delta	Ywhaz	E7EX29	28 kDa	1	1
ATP synthase subunit alpha, mitochondrial	Atp5a1	P25705	60 kDa	0	1	0
Nucleolin	Ncl	P19338	77 kDa	0	1	0
Desmoplakin	Dsp	P15924	332 kDa	0	0	1
Talin-1	Tln1	Q9Y490	270 kDa	0	0	1
Breakpoint cluster region protein	Bcr	P11274	143 kDa	0	1	2
Keratin, type II cytoskeletal 8	Krt8	P05787	54 kDa	0		2
Proliferation marker protein Ki-67	Mki67	P46013	359 kDa	0	0	2
Probable ubiquitin carboxyl-terminal hydrolase FAF-X	Usp9x	Q93008	292 kDa	0	0	2
Vimentin	Vim	B0YJC4	50 kDa	0		2
60 kDa heat shock protein, mitochondrial	Hspd1	P10809	61 kDa	0	5	3
Titin	Ttn	Q8WZ42-12-DECOY	?	0	3	4
Shc-1		Shc-1	72 kDa	0	1	71
T-complex protein 1 subunit gamma	Cct3	P49368	61 kDa	0
Bifunctional glutamate/proline--tRNA ligase	Eprs	P07814	171 kDa	0
Heterogeneous nuclear ribonucleoprotein D0	Hnrnpd	H0YA96	24 kDa	0
Plastin-2	Lcp1	P13796	70 kDa	0	0
L-lactate dehydrogenase A chain	Ldha	P00338-3	40 kDa	0	1
Poly(rC)-binding protein 2	Pcbp2	B4DXP5	34 kDa	0	0
Peptidyl-prolyl cis-trans isomerase A	Ppia	P62937	18 kDa	0	2
Voltage-dependent anion-selective channel protein 2	Vdac2	P45880	32 kDa	0
Putative annexin A2-like protein	Anxa2p2	A6NMY6	39 kDa		1	0
T-complex protein 1 subunit epsilon	Cct5	E7ENZ3	54 kDa		0	0
T-complex protein 1 subunit theta	Cct8	B4DEM7	58 kDa			0
Fatty acid synthase	Fasn	P49327	273 kDa		0	0
Rab GDP dissociation inhibitor beta	Gdi2	E7EU23	51 kDa			0
Poly [ADP-ribose] polymerase 1	Parp1	P09874	113 kDa		0	0
Glycerol-3-phosphate phosphatase	Pgp	A6NDG6	34 kDa		9	0
D-3-phosphoglycerate dehydrogenase	Phgdh	O43175	57 kDa			0
X-ray repair cross-complementing protein 6	Xrcc6	B1AHC8	65 kDa		0	0
Annexin A1	Anxa1	P04083	39 kDa		1	1
ATP synthase subunit beta	Atp5b	H0YH81	38 kDa		1	1
T-complex protein 1 subunit beta	Cct2	F5GWF6	57 kDa			1
Mitogen-activated protein kinase 1	Mapk1	A8CZ64	36 kDa			1
Nucleophosmin	Npm1	P06748	33 kDa			1
60S acidic ribosomal protein P0	Rplp0	F8VWS0	30 kDa		1	1
T-complex protein 1 subunit alpha	Tcp1	P17987	60 kDa			1
Tubulin beta-4B chain	Tubb4b	P68371	50 kDa			1
Keratin, type II cytoskeletal 78	Krt78	Q8N1N4	57 kDa		1	2
Proline-serine-threonine phosphatase-interacting protein 2	Pstpip2	Q9H939	39 kDa			2
SHC-transforming protein 1	Shc1	P29353-3	47 kDa			2
Structural maintenance of chromosomes protein 5	Smc5	Q8IY18	129 kDa			2
Testin	Tes	Q9UGI8	48 kDa		0	2
Zinc finger protein 687	Znf687	H0Y5I5	76 kDa			2
		gi|524957821|ref|XP_005078870.1|	?			2
Heterogeneous nuclear ribonucleoprotein K	Hnrnpk	P61978	51 kDa		2	3
Transgelin-2	Tagln2	P37802	22 kDa			3
ELKS/Rab6-interacting/CAST family member 1	Erc1	Q8IUD2-2	114 kDa		0	4
Splicing factor, proline- and glutamine-rich	Sfpq	P23246	76 kDa			4
Growth factor receptor-bound protein 2	Grb2	P62993	25 kDa			8
Tyrosine-protein phosphatase non-receptor type 12	Ptpn12	Q05209	88 kDa			19
Phosphatidylinositol 3,4,5-trisphosphate 5-phosphatase 2	Inppl1	O15357	139 kDa			34
Fructose-bisphosphate aldolase	Aldoa	J3KPS3	40 kDa		0
Calreticulin	Calr	P27797	48 kDa		0
T-complex protein 1 subunit delta	Cct4	B7Z2F4	42 kDa		0
cDNA FLJ52344, highly similar to T-complex protein 1 subunit zeta	Cct6a	B4DPJ8	55 kDa
Chloride intracellular channel protein 1	Clic1	O00299	27 kDa		1
Clathrin heavy chain 1	Cltc	Q00610	192 kDa		0
Elongation factor 1-delta	Eef1d	E9PI39	22 kDa
Elongation factor 1-gamma	Eef1g	P26641	50 kDa
Elongation factor 2	Eef2	P13639	95 kDa		1
Eukaryotic initiation factor 4A-I	Eif4a1	J3KT12	39 kDa
Alpha-enolase	Eno1	P06733	47 kDa		6
Fascin	Fscn1	J3KNT0	52 kDa
Glyceraldehyde-3-phosphate dehydrogenase	Gapdh	P04406	36 kDa		4
Receptor of-activated protein C kinase 1	Gnb2l1	D6RHH4	26 kDa
Glutathione S-transferase P	Gstp1	P09211	23 kDa
2-hydroxyacyl-CoA lyase 1	Hacl1	B4DWI1	61 kDa		17
Heat shock protein HSP 90-alpha	Hsp90aa1	P07900	85 kDa
Endoplasmin	Hsp90b1	P14625	92 kDa
Heat shock 70 kDa protein 4	Hspa4	P34932	94 kDa		1
L-lactate dehydrogenase B chain	Ldhb	P07195	37 kDa		0
Lymphocyte antigen 75	Ly75	O60449	198 kDa		2
Malate dehydrogenase, mitochondrial	Mdh2	P40926	36 kDa		0
Moesin	Msn	P26038	68 kDa
Nucleoside diphosphate kinase A	Nme1	P15531	17 kDa		1
Nuclear migration protein nudC	Nudc	Q9Y266	38 kDa
Proliferation-associated protein 2G4	Pa2g4	Q9UQ80	44 kDa
Multifunctional protein ADE2	Paics	E9PBS1	46 kDa
Profilin-1	Pfn1	P07737	15 kDa
6-phosphogluconate dehydrogenase, decarboxylating	Pgd	B4DQJ8	52 kDa		0
Phosphoglycerate kinase 1	Pgk1	B7Z7A9	41 kDa
Prohibitin	Phb	C9JW96	27 kDa
Pyruvate kinase PKM	Pkm	P14618	58 kDa		2
Peroxiredoxin-6	Prdx6	P30041	25 kDa
Tyrosine-protein phosphatase non-receptor type 11	Ptpn11	Q06124	68 kDa		40
GTP-binding nuclear protein Ran	Ran	B5MDF5	26 kDa		3
60S ribosomal protein L11	Rpl11	P62913	20 kDa		2
40S ribosomal protein S8	Rps8	P62241	24 kDa
Serine hydroxymethyltransferase, mitochondrial	Shmt2	G3V5L0	24 kDa
Staphylococcal nuclease domain-containing protein 1	Snd1	Q7KZF4	102 kDa
Lupus La protein	Ssb	P05455	47 kDa		1
cDNA FLJ56274, highly similar to Transketolase	Tkt	B4E022	63 kDa		0
Lamina-associated polypeptide 2, isoform alpha	Tmpo	P42166	75 kDa		0
Triosephosphate isomerase	Tpi1	P60174	31 kDa		1
Voltage-dependent anion-selective channel protein 1	Vdac1	C9JI87	20 kDa
14-3-3 protein epsilon	Ywhae	P62258-2	27 kDa
