# Supplementary material for: Structural and functional dissection of the DH and PH domains of oncogenic Bcr-Abl tyrosine kinase
Source: Nat Commun. 2017 Dec 13;8:2101. doi: 10.1038/s41467-017-02313-6 (PMC5727386; doi:10.1038/s41467-017-02313-6)
Supplement: Supplementary file 5 — Supplementary Data 2 [file 41467_2017_2313_MOESM5_ESM.xlsx]

## Sheet: liposome composition
Supplementary Data 2: Liposome composition for LiMA.
In total, 36 lipid mixtures were used for the liposome arrays. In all lipid mixtures, 18:1 (Δ9-Cis) PC (PC) is used as a carrier lipid, complemented with different concentrations of signaling lipid . Each lipid mixture contained a PEGylated lipid and a fluorescent lipid. The corresponding molar ratio for each lipid mixture is indicated in the columns labeled mol % .
		lipid concentration (mol%)
ID liposome	signaling lipid	signaling lipid	carrier lipid 18:1 (Δ9-Cis) PC (DOPC)	PEGylated lipid 18:1 PE-PEG350	Fluorescent lipid 18:1 PE-Atto647
PC			99.4	0.5	0.1
PC_PI3P_2	18:1 PI(3)P	2	97.4	0.5	0.1
PC_PI3P_4	18:1 PI(3)P	4	95.4	0.5	0.1
PC_PI3P_8	18:1 PI(3)P	8	91.4	0.5	0.1
PC_PI3P_10	18:1 PI(3)P	10	89.4	0.5	0.1
PC_PI4P_2	Brain PI(4)P	2	97.4	0.5	0.1
PC_PI4P_4	Brain PI(4)P	4	95.4	0.5	0.1
PC_PI4P_8	Brain PI(4)P	8	91.4	0.5	0.1
PC_PI4P_10	Brain PI(4)P	10	89.4	0.5	0.1
PC_PI5P_2	18:1 PI(5)P	2	97.4	0.5	0.1
PC_PI5P_4	18:1 PI(5)P	4	95.4	0.5	0.1
PC_PI5P_8	18:1 PI(5)P	8	91.4	0.5	0.1
PC_PI5P_10	18:1 PI(5)P	10	89.4	0.5	0.1
PC_PI(3,4)P2_2	18:1 PI(3,4)P2	2	97.4	0.5	0.1
PC_PI(3,4)P2_4	18:1 PI(3,4)P2	4	95.4	0.5	0.1
PC_PI(3,4)P2_8	18:1 PI(3,4)P2	8	91.4	0.5	0.1
PC_PI(3,4)P2_10	18:1 PI(3,4)P2	10	89.4	0.5	0.1
PC_PI(3,5)P2_2	18:1 PI(3,5)P2	2	97.4	0.5	0.1
PC_PI(3,5)P2_4	18:1 PI(3,5)P2	4	95.4	0.5	0.1
PC_PI(3,5)P2_8	18:1 PI(3,5)P2	8	91.4	0.5	0.1
PC_PI(3,5)P2_10	18:1 PI(3,5)P2	10	89.4	0.5	0.1
PC_PI(4,5)P2_2	18:1 PI(4,5)P2	2	97.4	0.5	0.1
PC_PI(4,5)P2_4	18:1 PI(4,5)P2	4	95.4	0.5	0.1
PC_PI(4,5)P2_8	18:1 PI(4,5)P2	8	91.4	0.5	0.1
PC_PI(4,5)P2_10	18:1 PI(4,5)P2	10	89.4	0.5	0.1
PC_PI(3,4,5)P3_2	18:1 PI(3,4,5)P3	2	97.4	0.5	0.1
PC_PI(3,4,5)P3_4	18:1 PI(3,4,5)P3	4	95.4	0.5	0.1
PC_PI(3,4,5)P3_8	18:1 PI(3,4,5)P3	8	91.4	0.5	0.1
PC_PI(3,4,5)P3_10	18:1 PI(3,4,5)P3	10	89.4	0.5	0.1
PC_PA_10	18:1 PA	10	89.4	0.5	0.1
PC_PE_10	18:1 PE	10	89.4	0.5	0.1
PC_PI_10	18:1 PI	10	89.4	0.5	0.1
PC_PS_10	18:1 PS	10	89.4	0.5	0.1
PC_LPA_10	18:1 Lyso PA	10	89.4	0.5	0.1
PC_LPC_10	18:1 Lyso PC	10	89.4	0.5	0.1
PC_S1P_10	Sphingosine-1-Phosphate (d18:1)	10	89.4	0.5	0.1
