# Supplementary material for: Structural and functional dissection of the DH and PH domains of oncogenic Bcr-Abl tyrosine kinase
Source: Nat Commun. 2017 Dec 13;8:2101. doi: 10.1038/s41467-017-02313-6 (PMC5727386; doi:10.1038/s41467-017-02313-6)
Supplement: Supplementary file 6 — Supplementary Data 3 [file 41467_2017_2313_MOESM6_ESM.xlsx]

## Sheet: LiMA_dataset
Supplementary Data 3: LiMA raw dataset.
In total, 4226 individual membrane binding experiments were performed using the liposome arrays. For each experiment, the liposome array was designed with a specific ID (column six). Each liposome array allowed the binding of one protein (column one), at one concentration (column two) against up to thirty liposomes (column four). The resulting binding affinity was expressed in NBI (normalized bin…
protein	replicate	protein concentration (μM)	ID liposome	NBI	liposome array ID
BcrDH	A1	5	PC	0.00492	2031
BcrDH	A2	5	PC	0.00247	2031
BcrDH	A3	5	PC	0.00155	2031
BcrDH	B1	5	PC	0.00625	2032
BcrDH	B2	5	PC	0.00336	2032
BcrDH	B3	5	PC	0.00205	2032
BcrDH	C1	5	PC	0.00619	2033
BcrDH	C2	5	PC	0.00235	2033
BcrDH	C3	5	PC	0.00338	2033
BcrDH	D1	5	PC	0.004	2046
BcrDH	D2	5	PC	0.003	2046
BcrDH	D3	5	PC	0.007	2046
BcrDH	E1	5	PC	0.005	2047
BcrDH	E2	5	PC	0.007	2047
BcrDH	E3	5	PC	0.011	2047
BcrDH	A1	2	PC	0.00313	2028
BcrDH	A2	2	PC	0.0166	2028
BcrDH	A3	2	PC	0.00295	2028
BcrDH	B1	2	PC	0.00252	2029
BcrDH	B2	2	PC	0.00415	2029
BcrDH	B3	2	PC	0.00655	2029
BcrDH	C1	2	PC	0.0064	2030
BcrDH	C2	2	PC	0.00352	2030
BcrDH	C3	2	PC	0.00239	2030
BcrDH	D1	2	PC	0.005	2043
BcrDH	D2	2	PC	0.002	2043
BcrDH	D3	2	PC	0.002	2043
BcrDH	E1	2	PC	0.003	2044
BcrDH	E2	2	PC	0.002	2044
BcrDH	E3	2	PC	0.002	2044
BcrDH	F1	2	PC	0.003	2045
BcrDH	F2	2	PC	0.003	2045
BcrDH	F3	2	PC	0.003	2045
BcrDH	A1	1	PC	0.00371	2025
BcrDH	A2	1	PC	0.00345	2025
BcrDH	A3	1	PC	0.00385	2025
BcrDH	B1	1	PC	0.00137	2026
BcrDH	B2	1	PC	0.00454	2026
BcrDH	B3	1	PC	0.00475	2026
BcrDH	C1	1	PC	0.00385	2027
BcrDH	C2	1	PC	NA	2027
BcrDH	C3	1	PC	0.00429	2027
BcrDH	D1	1	PC	0.003	2040
BcrDH	D2	1	PC	0.003	2040
BcrDH	D3	1	PC	0.002	2040
BcrDH	E1	1	PC	0.003	2041
BcrDH	E2	1	PC	0.002	2041
BcrDH	E3	1	PC	0.002	2041
BcrDH	F1	1	PC	0.003	2042
BcrDH	F2	1	PC	0.002	2042
BcrDH	F3	1	PC	0.001	2042
BcrDH	A1	0.5	PC	0.00594	2022
BcrDH	A2	0.5	PC	0.00202	2022
BcrDH	A3	0.5	PC	0.0037	2022
BcrDH	B1	0.5	PC	0.000809	2023
BcrDH	B2	0.5	PC	0.0346	2023
BcrDH	B3	0.5	PC	0.000832	2023
BcrDH	C1	0.5	PC	0.00154	2024
BcrDH	C2	0.5	PC	0.00219	2024
BcrDH	C3	0.5	PC	0.00157	2024
BcrDH	D1	0.5	PC	0.002	2037
BcrDH	D2	0.5	PC	0.002	2037
BcrDH	D3	0.5	PC	0.001	2037
BcrDH	E1	0.5	PC	0.001	2038
BcrDH	E2	0.5	PC	0.001	2038
BcrDH	E3	0.5	PC	0.002	2038
BcrDH	F1	0.5	PC	0.002	2039
BcrDH	F2	0.5	PC	0.001	2039
BcrDH	F3	0.5	PC	0.001	2039
BcrDH	A	5	PC_PA_10	0.00393	2031
BcrDH	B	5	PC_PA_10	0.0042	2032
BcrDH	C	5	PC_PA_10	NA	2033
BcrDH	D	5	PC_PA_10	0.014	2046
BcrDH	E	5	PC_PA_10	0.022	2047
BcrDH	A	2	PC_PA_10	0.00477	2028
BcrDH	B	2	PC_PA_10	0.00935	2029
BcrDH	C	2	PC_PA_10	0.00392	2030
BcrDH	D	2	PC_PA_10	0.01	2043
BcrDH	E	2	PC_PA_10	0.008	2044
BcrDH	F	2	PC_PA_10	0.008	2045
BcrDH	A	1	PC_PA_10	0.0223	2025
BcrDH	B	1	PC_PA_10	0.00171	2026
BcrDH	C	1	PC_PA_10	0.0101	2027
BcrDH	D	1	PC_PA_10	0.009	2040
BcrDH	E	1	PC_PA_10	0.006	2041
BcrDH	F	1	PC_PA_10	0.006	2042
BcrDH	A	0.5	PC_PA_10	0.0058	2022
BcrDH	B	0.5	PC_PA_10	NA	2023
BcrDH	C	0.5	PC_PA_10	0.00432	2024
BcrDH	D	0.5	PC_PA_10	0.011	2037
BcrDH	E	0.5	PC_PA_10	0.003	2038
BcrDH	F	0.5	PC_PA_10	0.004	2039
BcrDH	A	5	PC_PE_10	NA	2031
BcrDH	B	5	PC_PE_10	0.0269	2032
BcrDH	C	5	PC_PE_10	0.0232	2033
BcrDH	D	5	PC_PE_10	0.006	2046
BcrDH	E	5	PC_PE_10	0.008	2047
BcrDH	A	2	PC_PE_10	0.0254	2028
BcrDH	B	2	PC_PE_10	0.0259	2029
BcrDH	C	2	PC_PE_10	0.00233	2030
BcrDH	D	2	PC_PE_10	0.003	2043
BcrDH	E	2	PC_PE_10	0.003	2044
BcrDH	F	2	PC_PE_10	0.003	2045
BcrDH	A	1	PC_PE_10	0.0172	2025
BcrDH	B	1	PC_PE_10	0.00383	2026
BcrDH	C	1	PC_PE_10	NA	2027
BcrDH	D	1	PC_PE_10	0.003	2040
BcrDH	E	1	PC_PE_10	0.003	2041
BcrDH	F	1	PC_PE_10	0.003	2042
BcrDH	A	0.5	PC_PE_10	0.00626	2022
BcrDH	B	0.5	PC_PE_10	0.0144	2023
BcrDH	C	0.5	PC_PE_10	NA	2024
BcrDH	D	0.5	PC_PE_10	0.003	2037
BcrDH	E	0.5	PC_PE_10	0.007	2038
BcrDH	F	0.5	PC_PE_10	0.002	2039
BcrDH	A	5	PC_PI_10	0.00234	2031
BcrDH	B	5	PC_PI_10	0.00355	2032
BcrDH	C	5	PC_PI_10	0.00323	2033
BcrDH	D	5	PC_PI_10	0.01	2046
BcrDH	E	5	PC_PI_10	0.032	2047
BcrDH	A	2	PC_PI_10	0.00728	2028
BcrDH	B	2	PC_PI_10	0.00574	2029
BcrDH	C	2	PC_PI_10	0.00607	2030
BcrDH	D	2	PC_PI_10	0.003	2043
BcrDH	E	2	PC_PI_10	0.002	2044
BcrDH	F	2	PC_PI_10	0.002	2045
BcrDH	A	1	PC_PI_10	0.00447	2025
BcrDH	B	1	PC_PI_10	0.00383	2026
BcrDH	C	1	PC_PI_10	0.00549	2027
BcrDH	D	1	PC_PI_10	0.011	2040
BcrDH	E	1	PC_PI_10	0.003	2041
BcrDH	F	1	PC_PI_10	0.002	2042
BcrDH	A	0.5	PC_PI_10	0.0126	2022
BcrDH	B	0.5	PC_PI_10	0.00154	2023
BcrDH	C	0.5	PC_PI_10	0.005	2024
BcrDH	D	0.5	PC_PI_10	0.003	2037
BcrDH	E	0.5	PC_PI_10	0.003	2038
BcrDH	F	0.5	PC_PI_10	0.001	2039
BcrDH	A	5	PC_PI(3,4,5)P3_10	0.0385	2031
BcrDH	B	5	PC_PI(3,4,5)P3_10	0.0244	2032
BcrDH	C	5	PC_PI(3,4,5)P3_10	NA	2033
BcrDH	A	2	PC_PI(3,4,5)P3_10	NA	2028
BcrDH	B	2	PC_PI(3,4,5)P3_10	0.0904	2029
BcrDH	C	2	PC_PI(3,4,5)P3_10	NA	2030
BcrDH	A	1	PC_PI(3,4,5)P3_10	NA	2025
BcrDH	B	1	PC_PI(3,4,5)P3_10	NA	2026
BcrDH	C	1	PC_PI(3,4,5)P3_10	NA	2027
BcrDH	A	0.5	PC_PI(3,4,5)P3_10	NA	2022
BcrDH	B	0.5	PC_PI(3,4,5)P3_10	NA	2023
BcrDH	C	0.5	PC_PI(3,4,5)P3_10	NA	2024
BcrDH	A	5	PC_PI(3,4,5)P3_2	0.0021	2031
BcrDH	B	5	PC_PI(3,4,5)P3_2	0.00345	2032
BcrDH	C	5	PC_PI(3,4,5)P3_2	NA	2033
BcrDH	A	2	PC_PI(3,4,5)P3_2	0.00363	2028
BcrDH	B	2	PC_PI(3,4,5)P3_2	NA	2029
BcrDH	C	2	PC_PI(3,4,5)P3_2	0.00304	2030
BcrDH	A	1	PC_PI(3,4,5)P3_2	0.00351	2025
BcrDH	B	1	PC_PI(3,4,5)P3_2	0.00809	2026
BcrDH	C	1	PC_PI(3,4,5)P3_2	0.00409	2027
BcrDH	A	0.5	PC_PI(3,4,5)P3_2	NA	2022
BcrDH	B	0.5	PC_PI(3,4,5)P3_2	0.0011	2023
BcrDH	C	0.5	PC_PI(3,4,5)P3_2	0.00264	2024
BcrDH	A	5	PC_PI(3,4,5)P3_4	NA	2031
BcrDH	B	5	PC_PI(3,4,5)P3_4	0.0273	2032
BcrDH	C	5	PC_PI(3,4,5)P3_4	NA	2033
BcrDH	A	2	PC_PI(3,4,5)P3_4	NA	2028
BcrDH	B	2	PC_PI(3,4,5)P3_4	NA	2029
BcrDH	C	2	PC_PI(3,4,5)P3_4	NA	2030
BcrDH	A	1	PC_PI(3,4,5)P3_4	NA	2025
BcrDH	B	1	PC_PI(3,4,5)P3_4	NA	2026
BcrDH	C	1	PC_PI(3,4,5)P3_4	0.0184	2027
BcrDH	A	0.5	PC_PI(3,4,5)P3_4	NA	2022
BcrDH	B	0.5	PC_PI(3,4,5)P3_4	NA	2023
BcrDH	C	0.5	PC_PI(3,4,5)P3_4	0.00198	2024
BcrDH	A	5	PC_PI(3,4,5)P3_8	0.0407	2031
BcrDH	B	5	PC_PI(3,4,5)P3_8	NA	2032
BcrDH	C	5	PC_PI(3,4,5)P3_8	0.0188	2033
BcrDH	A	2	PC_PI(3,4,5)P3_8	0.016	2028
BcrDH	B	2	PC_PI(3,4,5)P3_8	0.0193	2029
BcrDH	C	2	PC_PI(3,4,5)P3_8	NA	2030
BcrDH	A	1	PC_PI(3,4,5)P3_8	0.022	2025
BcrDH	B	1	PC_PI(3,4,5)P3_8	0.00393	2026
BcrDH	C	1	PC_PI(3,4,5)P3_8	0.00442	2027
BcrDH	A	0.5	PC_PI(3,4,5)P3_8	NA	2022
BcrDH	B	0.5	PC_PI(3,4,5)P3_8	0.00165	2023
BcrDH	C	0.5	PC_PI(3,4,5)P3_8	NA	2024
BcrDH	A	5	PC_PI(3,4)P2_10	0.0371	2031
BcrDH	B	5	PC_PI(3,4)P2_10	0.0395	2032
BcrDH	C	5	PC_PI(3,4)P2_10	0.387	2033
BcrDH	A	2	PC_PI(3,4)P2_10	0.0177	2028
BcrDH	B	2	PC_PI(3,4)P2_10	0.522	2029
BcrDH	C	2	PC_PI(3,4)P2_10	0.502	2030
BcrDH	A	1	PC_PI(3,4)P2_10	0.574	2025
BcrDH	B	1	PC_PI(3,4)P2_10	0.554	2026
BcrDH	C	1	PC_PI(3,4)P2_10	0.0201	2027
BcrDH	A	0.5	PC_PI(3,4)P2_10	0.103	2022
BcrDH	B	0.5	PC_PI(3,4)P2_10	NA	2023
BcrDH	C	0.5	PC_PI(3,4)P2_10	0.00571	2024
BcrDH	A	5	PC_PI(3,4)P2_2	0.00346	2031
BcrDH	B	5	PC_PI(3,4)P2_2	0.0594	2032
BcrDH	C	5	PC_PI(3,4)P2_2	0.021	2033
BcrDH	A	2	PC_PI(3,4)P2_2	0.0278	2028
BcrDH	B	2	PC_PI(3,4)P2_2	0.00729	2029
BcrDH	C	2	PC_PI(3,4)P2_2	0.00452	2030
BcrDH	A	1	PC_PI(3,4)P2_2	0.00396	2025
BcrDH	B	1	PC_PI(3,4)P2_2	0.0033	2026
BcrDH	C	1	PC_PI(3,4)P2_2	0.00341	2027
BcrDH	A	0.5	PC_PI(3,4)P2_2	0.00373	2022
BcrDH	B	0.5	PC_PI(3,4)P2_2	0.00126	2023
BcrDH	C	0.5	PC_PI(3,4)P2_2	NA	2024
BcrDH	A	5	PC_PI(3,4)P2_4	0.117	2031
BcrDH	B	5	PC_PI(3,4)P2_4	0.0607	2032
BcrDH	C	5	PC_PI(3,4)P2_4	0.0216	2033
BcrDH	A	2	PC_PI(3,4)P2_4	0.0539	2028
BcrDH	B	2	PC_PI(3,4)P2_4	0.0758	2029
BcrDH	C	2	PC_PI(3,4)P2_4	0.0076	2030
BcrDH	A	1	PC_PI(3,4)P2_4	0.0055	2025
BcrDH	B	1	PC_PI(3,4)P2_4	0.0171	2026
BcrDH	C	1	PC_PI(3,4)P2_4	0.00615	2027
BcrDH	A	0.5	PC_PI(3,4)P2_4	0.00962	2022
BcrDH	B	0.5	PC_PI(3,4)P2_4	0.024	2023
BcrDH	C	0.5	PC_PI(3,4)P2_4	0.00587	2024
BcrDH	A	5	PC_PI(3,4)P2_8	0.0972	2031
BcrDH	B	5	PC_PI(3,4)P2_8	0.166	2032
BcrDH	C	5	PC_PI(3,4)P2_8	0.0945	2033
BcrDH	A	2	PC_PI(3,4)P2_8	0.0405	2028
BcrDH	B	2	PC_PI(3,4)P2_8	0.0572	2029
BcrDH	C	2	PC_PI(3,4)P2_8	0.0478	2030
BcrDH	A	1	PC_PI(3,4)P2_8	0.0293	2025
BcrDH	B	1	PC_PI(3,4)P2_8	0.123	2026
BcrDH	C	1	PC_PI(3,4)P2_8	0.0103	2027
BcrDH	A	0.5	PC_PI(3,4)P2_8	0.207	2022
BcrDH	B	0.5	PC_PI(3,4)P2_8	0.112	2023
BcrDH	C	0.5	PC_PI(3,4)P2_8	0.0884	2024
BcrDH	A	5	PC_PI(3,5)P2_10	0.0127	2031
BcrDH	B	5	PC_PI(3,5)P2_10	0.0639	2032
BcrDH	C	5	PC_PI(3,5)P2_10	NA	2033
BcrDH	A	2	PC_PI(3,5)P2_10	0.0201	2028
BcrDH	B	2	PC_PI(3,5)P2_10	0.0306	2029
BcrDH	C	2	PC_PI(3,5)P2_10	0.00918	2030
BcrDH	A	1	PC_PI(3,5)P2_10	NA	2025
BcrDH	B	1	PC_PI(3,5)P2_10	0.0044	2026
BcrDH	C	1	PC_PI(3,5)P2_10	0.00643	2027
BcrDH	A	0.5	PC_PI(3,5)P2_10	0.0162	2022
BcrDH	B	0.5	PC_PI(3,5)P2_10	0.00948	2023
BcrDH	C	0.5	PC_PI(3,5)P2_10	0.0234	2024
BcrDH	A	5	PC_PI(3,5)P2_2	0.00559	2031
BcrDH	B	5	PC_PI(3,5)P2_2	0.00773	2032
BcrDH	C	5	PC_PI(3,5)P2_2	0.0104	2033
BcrDH	A	2	PC_PI(3,5)P2_2	0.00696	2028
BcrDH	B	2	PC_PI(3,5)P2_2	0.00384	2029
BcrDH	C	2	PC_PI(3,5)P2_2	0.00709	2030
BcrDH	A	1	PC_PI(3,5)P2_2	0.0288	2025
BcrDH	B	1	PC_PI(3,5)P2_2	0.00146	2026
BcrDH	C	1	PC_PI(3,5)P2_2	0.00622	2027
BcrDH	A	0.5	PC_PI(3,5)P2_2	0.00771	2022
BcrDH	B	0.5	PC_PI(3,5)P2_2	NA	2023
BcrDH	C	0.5	PC_PI(3,5)P2_2	0.0025	2024
BcrDH	A	5	PC_PI(3,5)P2_4	0.00257	2031
BcrDH	B	5	PC_PI(3,5)P2_4	0.00371	2032
BcrDH	C	5	PC_PI(3,5)P2_4	0.00438	2033
BcrDH	A	2	PC_PI(3,5)P2_4	0.0106	2028
BcrDH	B	2	PC_PI(3,5)P2_4	0.0066	2029
BcrDH	C	2	PC_PI(3,5)P2_4	0.0029	2030
BcrDH	A	1	PC_PI(3,5)P2_4	0.0213	2025
BcrDH	B	1	PC_PI(3,5)P2_4	0.00401	2026
BcrDH	C	1	PC_PI(3,5)P2_4	NA	2027
BcrDH	A	0.5	PC_PI(3,5)P2_4	0.0077	2022
BcrDH	B	0.5	PC_PI(3,5)P2_4	0.0249	2023
BcrDH	C	0.5	PC_PI(3,5)P2_4	0.00294	2024
BcrDH	A	5	PC_PI(3,5)P2_8	0.00348	2031
BcrDH	B	5	PC_PI(3,5)P2_8	0.0183	2032
BcrDH	C	5	PC_PI(3,5)P2_8	0.00872	2033
BcrDH	A	2	PC_PI(3,5)P2_8	0.00984	2028
BcrDH	B	2	PC_PI(3,5)P2_8	0.0148	2029
BcrDH	C	2	PC_PI(3,5)P2_8	0.00407	2030
BcrDH	A	1	PC_PI(3,5)P2_8	0.00397	2025
BcrDH	B	1	PC_PI(3,5)P2_8	0.0127	2026
BcrDH	C	1	PC_PI(3,5)P2_8	0.00473	2027
BcrDH	A	0.5	PC_PI(3,5)P2_8	0.00276	2022
BcrDH	B	0.5	PC_PI(3,5)P2_8	0.00218	2023
BcrDH	C	0.5	PC_PI(3,5)P2_8	0.00687	2024
BcrDH	A	5	PC_PI3P_10	0.025	2046
BcrDH	B	5	PC_PI3P_10	0.008	2047
BcrDH	A	2	PC_PI3P_10	0.005	2043
BcrDH	B	2	PC_PI3P_10	0.003	2044
BcrDH	C	2	PC_PI3P_10	0.003	2045
BcrDH	A	1	PC_PI3P_10	0.004	2040
BcrDH	B	1	PC_PI3P_10	0.002	2041
BcrDH	C	1	PC_PI3P_10	0.003	2042
BcrDH	A	0.5	PC_PI3P_10	0.002	2037
BcrDH	B	0.5	PC_PI3P_10	0.003	2038
BcrDH	C	0.5	PC_PI3P_10	0.002	2039
BcrDH	A	5	PC_PI3P_2	NA	2046
BcrDH	B	5	PC_PI3P_2	0.048	2047
BcrDH	A	2	PC_PI3P_2	0.016	2043
BcrDH	B	2	PC_PI3P_2	0.053	2044
BcrDH	C	2	PC_PI3P_2	0.023	2045
BcrDH	A	1	PC_PI3P_2	0.018	2040
BcrDH	B	1	PC_PI3P_2	0.011	2041
BcrDH	C	1	PC_PI3P_2	0.016	2042
BcrDH	A	0.5	PC_PI3P_2	0.014	2037
BcrDH	B	0.5	PC_PI3P_2	0.018	2038
BcrDH	C	0.5	PC_PI3P_2	0.013	2039
BcrDH	A	5	PC_PI3P_4	0.003	2046
BcrDH	B	5	PC_PI3P_4	0.007	2047
BcrDH	A	2	PC_PI3P_4	0.002	2043
BcrDH	B	2	PC_PI3P_4	0.003	2044
BcrDH	C	2	PC_PI3P_4	0.003	2045
BcrDH	A	1	PC_PI3P_4	0.002	2040
BcrDH	B	1	PC_PI3P_4	0.002	2041
BcrDH	C	1	PC_PI3P_4	0.002	2042
BcrDH	A	0.5	PC_PI3P_4	0.001	2037
BcrDH	B	0.5	PC_PI3P_4	0.001	2038
BcrDH	C	0.5	PC_PI3P_4	0.002	2039
BcrDH	A	5	PC_PI3P_8	0.004	2046
BcrDH	B	5	PC_PI3P_8	0.015	2047
BcrDH	A	2	PC_PI3P_8	0.005	2043
BcrDH	B	2	PC_PI3P_8	0.005	2044
BcrDH	C	2	PC_PI3P_8	0.005	2045
BcrDH	A	1	PC_PI3P_8	0.003	2040
BcrDH	B	1	PC_PI3P_8	0.002	2041
BcrDH	C	1	PC_PI3P_8	0.002	2042
BcrDH	A	0.5	PC_PI3P_8	0.002	2037
BcrDH	B	0.5	PC_PI3P_8	NA	2038
BcrDH	C	0.5	PC_PI3P_8	0.002	2039
BcrDH	A	5	PC_PI(4,5)P2_10	NA	2031
BcrDH	B	5	PC_PI(4,5)P2_10	0.0639	2032
BcrDH	C	5	PC_PI(4,5)P2_10	0.0191	2033
BcrDH	A	2	PC_PI(4,5)P2_10	0.0155	2028
BcrDH	B	2	PC_PI(4,5)P2_10	0.00491	2029
BcrDH	C	2	PC_PI(4,5)P2_10	0.0167	2030
BcrDH	A	1	PC_PI(4,5)P2_10	NA	2025
BcrDH	B	1	PC_PI(4,5)P2_10	0.0935	2026
BcrDH	C	1	PC_PI(4,5)P2_10	NA	2027
BcrDH	A	0.5	PC_PI(4,5)P2_10	0.0101	2022
BcrDH	B	0.5	PC_PI(4,5)P2_10	NA	2023
BcrDH	C	0.5	PC_PI(4,5)P2_10	0.076	2024
BcrDH	A	5	PC_PI(4,5)P2_2	0.00191	2031
BcrDH	B	5	PC_PI(4,5)P2_2	0.0497	2032
BcrDH	C	5	PC_PI(4,5)P2_2	NA	2033
BcrDH	A	2	PC_PI(4,5)P2_2	0.0264	2028
BcrDH	B	2	PC_PI(4,5)P2_2	0.00197	2029
BcrDH	C	2	PC_PI(4,5)P2_2	0.0341	2030
BcrDH	A	1	PC_PI(4,5)P2_2	0.0034	2025
BcrDH	B	1	PC_PI(4,5)P2_2	0.0252	2026
BcrDH	C	1	PC_PI(4,5)P2_2	0.00542	2027
BcrDH	A	0.5	PC_PI(4,5)P2_2	NA	2022
BcrDH	B	0.5	PC_PI(4,5)P2_2	0.00159	2023
BcrDH	C	0.5	PC_PI(4,5)P2_2	0.0198	2024
BcrDH	A	5	PC_PI(4,5)P2_4	0.0404	2031
BcrDH	B	5	PC_PI(4,5)P2_4	0.0324	2032
BcrDH	C	5	PC_PI(4,5)P2_4	0.142	2033
BcrDH	A	2	PC_PI(4,5)P2_4	0.0123	2028
BcrDH	B	2	PC_PI(4,5)P2_4	0.0503	2029
BcrDH	C	2	PC_PI(4,5)P2_4	0.0344	2030
BcrDH	A	1	PC_PI(4,5)P2_4	0.00943	2025
BcrDH	B	1	PC_PI(4,5)P2_4	0.00332	2026
BcrDH	C	1	PC_PI(4,5)P2_4	0.0091	2027
BcrDH	A	0.5	PC_PI(4,5)P2_4	0.00965	2022
BcrDH	B	0.5	PC_PI(4,5)P2_4	0.00951	2023
BcrDH	C	0.5	PC_PI(4,5)P2_4	0.0194	2024
BcrDH	A	5	PC_PI(4,5)P2_8	0.012	2031
BcrDH	B	5	PC_PI(4,5)P2_8	0.00369	2032
BcrDH	C	5	PC_PI(4,5)P2_8	0.0102	2033
BcrDH	A	2	PC_PI(4,5)P2_8	NA	2028
BcrDH	B	2	PC_PI(4,5)P2_8	0.00438	2029
BcrDH	C	2	PC_PI(4,5)P2_8	0.00513	2030
BcrDH	A	1	PC_PI(4,5)P2_8	0.00348	2025
BcrDH	B	1	PC_PI(4,5)P2_8	0.00563	2026
BcrDH	C	1	PC_PI(4,5)P2_8	0.00653	2027
BcrDH	A	0.5	PC_PI(4,5)P2_8	NA	2022
BcrDH	B	0.5	PC_PI(4,5)P2_8	0.0203	2023
BcrDH	C	0.5	PC_PI(4,5)P2_8	NA	2024
BcrDH	A	5	PC_PI5P_10	0.021	2046
BcrDH	B	5	PC_PI5P_10	0.019	2047
BcrDH	A	2	PC_PI5P_10	0.013	2043
BcrDH	B	2	PC_PI5P_10	0.015	2044
BcrDH	C	2	PC_PI5P_10	0.032	2045
BcrDH	A	1	PC_PI5P_10	0.005	2040
BcrDH	B	1	PC_PI5P_10	0.003	2041
BcrDH	C	1	PC_PI5P_10	0.003	2042
BcrDH	A	0.5	PC_PI5P_10	0.004	2037
BcrDH	B	0.5	PC_PI5P_10	0.005	2038
BcrDH	C	0.5	PC_PI5P_10	0.002	2039
BcrDH	A	5	PC_PI5P_2	0.004	2046
BcrDH	B	5	PC_PI5P_2	0.011	2047
BcrDH	A	2	PC_PI5P_2	0.002	2043
BcrDH	B	2	PC_PI5P_2	0.002	2044
BcrDH	C	2	PC_PI5P_2	0.004	2045
BcrDH	A	1	PC_PI5P_2	0.003	2040
BcrDH	B	1	PC_PI5P_2	0.002	2041
BcrDH	C	1	PC_PI5P_2	0.002	2042
BcrDH	A	0.5	PC_PI5P_2	0.002	2037
BcrDH	B	0.5	PC_PI5P_2	0.002	2038
BcrDH	C	0.5	PC_PI5P_2	0.001	2039
BcrDH	A	5	PC_PI5P_4	0.003	2046
BcrDH	B	5	PC_PI5P_4	0.03	2047
BcrDH	A	2	PC_PI5P_4	0.003	2043
BcrDH	B	2	PC_PI5P_4	0.002	2044
BcrDH	C	2	PC_PI5P_4	0.003	2045
BcrDH	A	1	PC_PI5P_4	0.002	2040
BcrDH	B	1	PC_PI5P_4	0.002	2041
BcrDH	C	1	PC_PI5P_4	0.002	2042
BcrDH	A	0.5	PC_PI5P_4	0.002	2037
BcrDH	B	0.5	PC_PI5P_4	0.002	2038
BcrDH	C	0.5	PC_PI5P_4	0.001	2039
BcrDH	A	5	PC_PI5P_8	0.005	2046
BcrDH	B	5	PC_PI5P_8	0.005	2047
BcrDH	A	2	PC_PI5P_8	0.002	2043
BcrDH	B	2	PC_PI5P_8	0.002	2044
BcrDH	C	2	PC_PI5P_8	0.003	2045
BcrDH	A	1	PC_PI5P_8	0.003	2040
BcrDH	B	1	PC_PI5P_8	0.002	2041
BcrDH	C	1	PC_PI5P_8	0.002	2042
BcrDH	A	0.5	PC_PI5P_8	0.002	2037
BcrDH	B	0.5	PC_PI5P_8	0.002	2038
BcrDH	C	0.5	PC_PI5P_8	0.001	2039
BcrDH	A	5	PC_PS_10	NA	2031
BcrDH	B	5	PC_PS_10	0.0166	2032
BcrDH	C	5	PC_PS_10	0.0267	2033
BcrDH	D	5	PC_PS_10	0.006	2046
BcrDH	E	5	PC_PS_10	0.009	2047
BcrDH	A	2	PC_PS_10	0.0203	2028
BcrDH	B	2	PC_PS_10	0.00632	2029
BcrDH	C	2	PC_PS_10	0.00632	2030
BcrDH	D	2	PC_PS_10	0.003	2043
BcrDH	E	2	PC_PS_10	0.004	2044
BcrDH	F	2	PC_PS_10	0.003	2045
BcrDH	A	1	PC_PS_10	0.00554	2025
BcrDH	B	1	PC_PS_10	0.00372	2026
BcrDH	C	1	PC_PS_10	0.0164	2027
BcrDH	D	1	PC_PS_10	0.006	2040
BcrDH	E	1	PC_PS_10	0.004	2041
BcrDH	F	1	PC_PS_10	0.003	2042
BcrDH	A	0.5	PC_PS_10	0.00501	2022
BcrDH	B	0.5	PC_PS_10	0.0221	2023
BcrDH	C	0.5	PC_PS_10	0.00638	2024
BcrDH	D	0.5	PC_PS_10	0.005	2037
BcrDH	E	0.5	PC_PS_10	0.003	2038
BcrDH	F	0.5	PC_PS_10	0.004	2039
BcrDH	A	5	PC_LPA_10	0.00159	2031
BcrDH	B	5	PC_LPA_10	0.00144	2032
BcrDH	C	5	PC_LPA_10	0.00367	2033
BcrDH	D	5	PC_LPA_10	0.021	2046
BcrDH	E	5	PC_LPA_10	0.048	2047
BcrDH	A	2	PC_LPA_10	0.00725	2028
BcrDH	B	2	PC_LPA_10	0.00454	2029
BcrDH	C	2	PC_LPA_10	0.00487	2030
BcrDH	D	2	PC_LPA_10	0.003	2043
BcrDH	E	2	PC_LPA_10	0.002	2044
BcrDH	F	2	PC_LPA_10	0.002	2045
BcrDH	A	1	PC_LPA_10	0.00259	2025
BcrDH	B	1	PC_LPA_10	0.00212	2026
BcrDH	C	1	PC_LPA_10	0.0149	2027
BcrDH	D	1	PC_LPA_10	0.003	2040
BcrDH	E	1	PC_LPA_10	0.002	2041
BcrDH	F	1	PC_LPA_10	0.001	2042
BcrDH	A	0.5	PC_LPA_10	0.00527	2022
BcrDH	B	0.5	PC_LPA_10	0.00115	2023
BcrDH	C	0.5	PC_LPA_10	0.00108	2024
BcrDH	D	0.5	PC_LPA_10	0.003	2037
BcrDH	E	0.5	PC_LPA_10	0.003	2038
BcrDH	F	0.5	PC_LPA_10	0.001	2039
BcrDH	A	5	PC_LPC_10	0.00171	2031
BcrDH	B	5	PC_LPC_10	0.00215	2032
BcrDH	C	5	PC_LPC_10	0.00231	2033
BcrDH	D	5	PC_LPC_10	0.014	2046
BcrDH	E	5	PC_LPC_10	0.011	2047
BcrDH	A	2	PC_LPC_10	0.00304	2028
BcrDH	B	2	PC_LPC_10	0.00503	2029
BcrDH	C	2	PC_LPC_10	0.00663	2030
BcrDH	D	2	PC_LPC_10	0.003	2043
BcrDH	E	2	PC_LPC_10	0.002	2044
BcrDH	F	2	PC_LPC_10	0.002	2045
BcrDH	A	1	PC_LPC_10	0.00318	2025
BcrDH	B	1	PC_LPC_10	0.00234	2026
BcrDH	C	1	PC_LPC_10	0.00497	2027
BcrDH	D	1	PC_LPC_10	0.004	2040
BcrDH	E	1	PC_LPC_10	0.001	2041
BcrDH	F	1	PC_LPC_10	0.001	2042
BcrDH	A	0.5	PC_LPC_10	0.00583	2022
BcrDH	B	0.5	PC_LPC_10	0.000999	2023
BcrDH	C	0.5	PC_LPC_10	0.00272	2024
BcrDH	D	0.5	PC_LPC_10	0.002	2037
BcrDH	E	0.5	PC_LPC_10	0.002	2038
BcrDH	F	0.5	PC_LPC_10	0.001	2039
BcrDH	A	5	PC_PI4P_10	0.006	2046
BcrDH	B	5	PC_PI4P_10	0.108	2047
BcrDH	A	2	PC_PI4P_10	0.005	2043
BcrDH	B	2	PC_PI4P_10	0.005	2044
BcrDH	C	2	PC_PI4P_10	0.004	2045
BcrDH	A	1	PC_PI4P_10	0.005	2040
BcrDH	B	1	PC_PI4P_10	0.003	2041
BcrDH	C	1	PC_PI4P_10	0.004	2042
BcrDH	A	0.5	PC_PI4P_10	0.003	2037
BcrDH	B	0.5	PC_PI4P_10	0.019	2038
BcrDH	C	0.5	PC_PI4P_10	0.003	2039
BcrDH	A	5	PC_PI4P_2	0.003	2046
BcrDH	B	5	PC_PI4P_2	0.017	2047
BcrDH	A	2	PC_PI4P_2	0.004	2043
BcrDH	B	2	PC_PI4P_2	0.005	2044
BcrDH	C	2	PC_PI4P_2	0.025	2045
BcrDH	A	1	PC_PI4P_2	0.003	2040
BcrDH	B	1	PC_PI4P_2	0.002	2041
BcrDH	C	1	PC_PI4P_2	0.002	2042
BcrDH	A	0.5	PC_PI4P_2	0.002	2037
BcrDH	B	0.5	PC_PI4P_2	0.018	2038
BcrDH	C	0.5	PC_PI4P_2	0.001	2039
BcrDH	A	5	PC_PI4P_4	0.043	2046
BcrDH	B	5	PC_PI4P_4	0.012	2047
BcrDH	A	2	PC_PI4P_4	0.004	2043
BcrDH	B	2	PC_PI4P_4	0.003	2044
BcrDH	C	2	PC_PI4P_4	0.002	2045
BcrDH	A	1	PC_PI4P_4	0.003	2040
BcrDH	B	1	PC_PI4P_4	0.003	2041
BcrDH	C	1	PC_PI4P_4	0.002	2042
BcrDH	A	0.5	PC_PI4P_4	0.002	2037
BcrDH	B	0.5	PC_PI4P_4	0.002	2038
BcrDH	C	0.5	PC_PI4P_4	0.001	2039
BcrDH	A	5	PC_PI4P_8	0.021	2046
BcrDH	B	5	PC_PI4P_8	0.026	2047
BcrDH	A	2	PC_PI4P_8	NA	2043
BcrDH	B	2	PC_PI4P_8	0.015	2044
BcrDH	C	2	PC_PI4P_8	0.027	2045
BcrDH	A	1	PC_PI4P_8	0.006	2040
BcrDH	B	1	PC_PI4P_8	0.006	2041
BcrDH	C	1	PC_PI4P_8	0.004	2042
BcrDH	A	0.5	PC_PI4P_8	0.004	2037
BcrDH	B	0.5	PC_PI4P_8	0.003	2038
BcrDH	C	0.5	PC_PI4P_8	0.003	2039
BcrDH	A	5	PC_S1P_10	0.0049	2031
BcrDH	B	5	PC_S1P_10	0.00144	2032
BcrDH	C	5	PC_S1P_10	0.00224	2033
BcrDH	D	5	PC_S1P_10	0.01	2046
BcrDH	E	5	PC_S1P_10	0.013	2047
BcrDH	A	2	PC_S1P_10	0.00212	2028
BcrDH	B	2	PC_S1P_10	0.00301	2029
BcrDH	C	2	PC_S1P_10	0.00277	2030
BcrDH	D	2	PC_S1P_10	0.004	2043
BcrDH	E	2	PC_S1P_10	0.003	2044
BcrDH	F	2	PC_S1P_10	0.002	2045
BcrDH	A	1	PC_S1P_10	0.00349	2025
BcrDH	B	1	PC_S1P_10	0.00766	2026
BcrDH	C	1	PC_S1P_10	0.00577	2027
BcrDH	D	1	PC_S1P_10	0.006	2040
BcrDH	E	1	PC_S1P_10	0.004	2041
BcrDH	F	1	PC_S1P_10	0.004	2042
BcrDH	A	0.5	PC_S1P_10	0.00342	2022
BcrDH	B	0.5	PC_S1P_10	0.00236	2023
BcrDH	C	0.5	PC_S1P_10	0.0022	2024
BcrDH	D	0.5	PC_S1P_10	0.004	2037
BcrDH	E	0.5	PC_S1P_10	0.011	2038
BcrDH	F	0.5	PC_S1P_10	0.003	2039
BcrDHPH	A1	5	PC	0.0723	2059
BcrDHPH	A2	5	PC	0.271	2059
BcrDHPH	A3	5	PC	0.0335	2059
BcrDHPH	B1	5	PC	NA	2060
BcrDHPH	B2	5	PC	0.0268	2060
BcrDHPH	B3	5	PC	0.0158	2060
BcrDHPH	C1	5	PC	0.00965	2061
BcrDHPH	C2	5	PC	0.0326	2061
BcrDHPH	C3	5	PC	0.0135	2061
BcrDHPH	D1	5	PC	0.011	2074
BcrDHPH	D2	5	PC	0.004	2074
BcrDHPH	D3	5	PC	0.005	2074
BcrDHPH	E1	5	PC	NA	2137
BcrDHPH	E2	5	PC	NA	2137
BcrDHPH	E3	5	PC	NA	2137
BcrDHPH	F1	5	PC	NA	2138
BcrDHPH	F2	5	PC	NA	2138
BcrDHPH	F3	5	PC	NA	2138
BcrDHPH	A1	2	PC	0.22	2056
BcrDHPH	A2	2	PC	0.0466	2056
BcrDHPH	A3	2	PC	0.0164	2056
BcrDHPH	B1	2	PC	0.0658	2057
BcrDHPH	B2	2	PC	0.848	2057
BcrDHPH	B3	2	PC	0.0168	2057
BcrDHPH	C1	2	PC	0.047	2058
BcrDHPH	C2	2	PC	NA	2058
BcrDHPH	C3	2	PC	0.0162	2058
BcrDHPH	D1	2	PC	0.004	2071
BcrDHPH	D2	2	PC	0.005	2071
BcrDHPH	D3	2	PC	0.013	2071
BcrDHPH	E1	2	PC	0.003	2072
BcrDHPH	E2	2	PC	0.006	2072
BcrDHPH	E3	2	PC	0.006	2072
BcrDHPH	F1	2	PC	0.004	2073
BcrDHPH	F2	2	PC	0.003	2073
BcrDHPH	F3	2	PC	0.004	2073
BcrDHPH	A1	1	PC	0.0123	2053
BcrDHPH	A2	1	PC	0.0337	2053
BcrDHPH	A3	1	PC	0.00482	2053
BcrDHPH	B1	1	PC	0.0179	2054
BcrDHPH	B2	1	PC	0.104	2054
BcrDHPH	B3	1	PC	0.0026	2054
BcrDHPH	C1	1	PC	0.0979	2055
BcrDHPH	C2	1	PC	0.122	2055
BcrDHPH	C3	1	PC	0.00874	2055
BcrDHPH	D1	1	PC	0.002	2068
BcrDHPH	D2	1	PC	0.004	2068
BcrDHPH	D3	1	PC	0.003	2068
BcrDHPH	E1	1	PC	0.003	2069
BcrDHPH	E2	1	PC	0.003	2069
BcrDHPH	E3	1	PC	0.003	2069
BcrDHPH	F1	1	PC	0.004	2070
BcrDHPH	F2	1	PC	0.005	2070
BcrDHPH	F3	1	PC	0.006	2070
BcrDHPH	A1	0.5	PC	NA	2050
BcrDHPH	A2	0.5	PC	0.0957	2050
BcrDHPH	A3	0.5	PC	0.00253	2050
BcrDHPH	B1	0.5	PC	0.0322	2051
BcrDHPH	B2	0.5	PC	0.186	2051
BcrDHPH	B3	0.5	PC	0.00696	2051
BcrDHPH	C1	0.5	PC	0.000493	2052
BcrDHPH	C2	0.5	PC	0.000518	2052
BcrDHPH	C3	0.5	PC	0.00178	2052
BcrDHPH	D1	0.5	PC	0.001	2065
BcrDHPH	D2	0.5	PC	0.003	2065
BcrDHPH	D3	0.5	PC	0.004	2065
BcrDHPH	E1	0.5	PC	0.004	2066
BcrDHPH	E2	0.5	PC	0.004	2066
BcrDHPH	E3	0.5	PC	0.003	2066
BcrDHPH	F1	0.5	PC	0.002	2067
BcrDHPH	F2	0.5	PC	0.006	2067
BcrDHPH	F3	0.5	PC	0.005	2067
BcrDHPH	A	5	PC_PA_10	0.0358	2059
BcrDHPH	B	5	PC_PA_10	NA	2060
BcrDHPH	C	5	PC_PA_10	0.00697	2061
BcrDHPH	D	5	PC_PA_10	0.044	2074
BcrDHPH	E	5	PC_PA_10	NA	2137
BcrDHPH	F	5	PC_PA_10	NA	2138
BcrDHPH	A	2	PC_PA_10	0.0448	2056
BcrDHPH	B	2	PC_PA_10	0.00769	2057
BcrDHPH	C	2	PC_PA_10	0.301	2058
BcrDHPH	D	2	PC_PA_10	0.029	2071
BcrDHPH	E	2	PC_PA_10	0.027	2072
BcrDHPH	F	2	PC_PA_10	0.038	2073
BcrDHPH	A	1	PC_PA_10	0.00571	2053
BcrDHPH	B	1	PC_PA_10	0.0275	2054
BcrDHPH	C	1	PC_PA_10	0.015	2055
BcrDHPH	D	1	PC_PA_10	0.037	2068
BcrDHPH	E	1	PC_PA_10	0.017	2069
BcrDHPH	F	1	PC_PA_10	0.034	2070
BcrDHPH	A	0.5	PC_PA_10	0.0523	2050
BcrDHPH	B	0.5	PC_PA_10	0.0122	2051
BcrDHPH	C	0.5	PC_PA_10	0.00204	2052
BcrDHPH	D	0.5	PC_PA_10	0.02	2065
BcrDHPH	E	0.5	PC_PA_10	0.013	2066
BcrDHPH	F	0.5	PC_PA_10	0.007	2067
BcrDHPH	A	5	PC_PE_10	NA	2059
BcrDHPH	B	5	PC_PE_10	0.0291	2060
BcrDHPH	C	5	PC_PE_10	0.0173	2061
BcrDHPH	D	5	PC_PE_10	0.025	2074
BcrDHPH	E	5	PC_PE_10	NA	2137
BcrDHPH	F	5	PC_PE_10	NA	2138
BcrDHPH	A	2	PC_PE_10	0.0697	2056
BcrDHPH	B	2	PC_PE_10	0.0264	2057
BcrDHPH	C	2	PC_PE_10	0.0763	2058
BcrDHPH	D	2	PC_PE_10	0.013	2071
BcrDHPH	E	2	PC_PE_10	0.014	2072
BcrDHPH	F	2	PC_PE_10	0.012	2073
BcrDHPH	A	1	PC_PE_10	0.0064	2053
BcrDHPH	B	1	PC_PE_10	0.00508	2054
BcrDHPH	C	1	PC_PE_10	0.00444	2055
BcrDHPH	D	1	PC_PE_10	0.005	2068
BcrDHPH	E	1	PC_PE_10	0.006	2069
BcrDHPH	F	1	PC_PE_10	0.008	2070
BcrDHPH	A	0.5	PC_PE_10	0.0199	2050
BcrDHPH	B	0.5	PC_PE_10	0.00566	2051
BcrDHPH	C	0.5	PC_PE_10	0.00177	2052
BcrDHPH	D	0.5	PC_PE_10	0.004	2065
BcrDHPH	E	0.5	PC_PE_10	0.003	2066
BcrDHPH	F	0.5	PC_PE_10	0.003	2067
BcrDHPH	A	5	PC_PI_10	0.0339	2059
BcrDHPH	B	5	PC_PI_10	0.0256	2060
BcrDHPH	C	5	PC_PI_10	0.0123	2061
BcrDHPH	D	5	PC_PI_10	0.035	2074
BcrDHPH	E	5	PC_PI_10	NA	2137
BcrDHPH	F	5	PC_PI_10	NA	2138
BcrDHPH	A	2	PC_PI_10	0.0199	2056
BcrDHPH	B	2	PC_PI_10	NA	2057
BcrDHPH	C	2	PC_PI_10	0.0627	2058
BcrDHPH	D	2	PC_PI_10	0.01	2071
BcrDHPH	E	2	PC_PI_10	0.009	2072
BcrDHPH	F	2	PC_PI_10	0.015	2073
BcrDHPH	A	1	PC_PI_10	0.00629	2053
BcrDHPH	B	1	PC_PI_10	0.00751	2054
BcrDHPH	C	1	PC_PI_10	0.00546	2055
BcrDHPH	D	1	PC_PI_10	0.005	2068
BcrDHPH	E	1	PC_PI_10	0.004	2069
BcrDHPH	F	1	PC_PI_10	0.005	2070
BcrDHPH	A	0.5	PC_PI_10	0.00347	2050
BcrDHPH	B	0.5	PC_PI_10	0.00717	2051
BcrDHPH	C	0.5	PC_PI_10	0.00477	2052
BcrDHPH	D	0.5	PC_PI_10	0.001	2065
BcrDHPH	E	0.5	PC_PI_10	0.002	2066
BcrDHPH	F	0.5	PC_PI_10	0.003	2067
BcrDHPH	A	5	PC_PI(3,4,5)P3_10	0.507	2059
BcrDHPH	B	5	PC_PI(3,4,5)P3_10	0.533	2060
BcrDHPH	C	5	PC_PI(3,4,5)P3_10	NA	2061
BcrDHPH	A	2	PC_PI(3,4,5)P3_10	0.496	2056
BcrDHPH	B	2	PC_PI(3,4,5)P3_10	NA	2057
BcrDHPH	C	2	PC_PI(3,4,5)P3_10	NA	2058
BcrDHPH	A	1	PC_PI(3,4,5)P3_10	0.52	2053
BcrDHPH	B	1	PC_PI(3,4,5)P3_10	0.3	2054
BcrDHPH	C	1	PC_PI(3,4,5)P3_10	0.331	2055
BcrDHPH	A	0.5	PC_PI(3,4,5)P3_10	0.345	2050
BcrDHPH	B	0.5	PC_PI(3,4,5)P3_10	0.225	2051
BcrDHPH	C	0.5	PC_PI(3,4,5)P3_10	0.000512	2052
BcrDHPH	A	5	PC_PI(3,4,5)P3_2	0.336	2059
BcrDHPH	B	5	PC_PI(3,4,5)P3_2	0.424	2060
BcrDHPH	C	5	PC_PI(3,4,5)P3_2	0.159	2061
BcrDHPH	A	2	PC_PI(3,4,5)P3_2	NA	2056
BcrDHPH	B	2	PC_PI(3,4,5)P3_2	0.373	2057
BcrDHPH	C	2	PC_PI(3,4,5)P3_2	0.202	2058
BcrDHPH	A	1	PC_PI(3,4,5)P3_2	0.349	2053
BcrDHPH	B	1	PC_PI(3,4,5)P3_2	0.379	2054
BcrDHPH	C	1	PC_PI(3,4,5)P3_2	0.324	2055
BcrDHPH	A	0.5	PC_PI(3,4,5)P3_2	0.252	2050
BcrDHPH	B	0.5	PC_PI(3,4,5)P3_2	0.146	2051
BcrDHPH	C	0.5	PC_PI(3,4,5)P3_2	0.000757	2052
BcrDHPH	A	5	PC_PI(3,4,5)P3_4	0.444	2059
BcrDHPH	B	5	PC_PI(3,4,5)P3_4	NA	2060
BcrDHPH	C	5	PC_PI(3,4,5)P3_4	0.186	2061
BcrDHPH	A	2	PC_PI(3,4,5)P3_4	0.514	2056
BcrDHPH	B	2	PC_PI(3,4,5)P3_4	NA	2057
BcrDHPH	C	2	PC_PI(3,4,5)P3_4	0.123	2058
BcrDHPH	A	1	PC_PI(3,4,5)P3_4	NA	2053
BcrDHPH	B	1	PC_PI(3,4,5)P3_4	0.132	2054
BcrDHPH	C	1	PC_PI(3,4,5)P3_4	NA	2055
BcrDHPH	A	0.5	PC_PI(3,4,5)P3_4	0.0596	2050
BcrDHPH	B	0.5	PC_PI(3,4,5)P3_4	0.152	2051
BcrDHPH	C	0.5	PC_PI(3,4,5)P3_4	0.004	2052
BcrDHPH	A	5	PC_PI(3,4,5)P3_8	0.506	2059
BcrDHPH	B	5	PC_PI(3,4,5)P3_8	0.541	2060
BcrDHPH	C	5	PC_PI(3,4,5)P3_8	NA	2061
BcrDHPH	A	2	PC_PI(3,4,5)P3_8	0.169	2056
BcrDHPH	B	2	PC_PI(3,4,5)P3_8	0.473	2057
BcrDHPH	C	2	PC_PI(3,4,5)P3_8	0.958	2058
BcrDHPH	A	1	PC_PI(3,4,5)P3_8	NA	2053
BcrDHPH	B	1	PC_PI(3,4,5)P3_8	0.434	2054
BcrDHPH	C	1	PC_PI(3,4,5)P3_8	NA	2055
BcrDHPH	A	0.5	PC_PI(3,4,5)P3_8	0.194	2050
BcrDHPH	B	0.5	PC_PI(3,4,5)P3_8	NA	2051
BcrDHPH	C	0.5	PC_PI(3,4,5)P3_8	0.00102	2052
BcrDHPH	A	5	PC_PI(3,4)P2_10	0.0861	2059
BcrDHPH	B	5	PC_PI(3,4)P2_10	0.113	2060
BcrDHPH	C	5	PC_PI(3,4)P2_10	0.0136	2061
BcrDHPH	A	2	PC_PI(3,4)P2_10	0.472	2056
BcrDHPH	B	2	PC_PI(3,4)P2_10	0.893	2057
BcrDHPH	C	2	PC_PI(3,4)P2_10	0.771	2058
BcrDHPH	A	1	PC_PI(3,4)P2_10	0.955	2053
BcrDHPH	B	1	PC_PI(3,4)P2_10	0.065	2054
BcrDHPH	C	1	PC_PI(3,4)P2_10	NA	2055
BcrDHPH	A	0.5	PC_PI(3,4)P2_10	0.0665	2050
BcrDHPH	B	0.5	PC_PI(3,4)P2_10	0.265	2051
BcrDHPH	C	0.5	PC_PI(3,4)P2_10	0.000627	2052
BcrDHPH	A	5	PC_PI(3,4)P2_2	0.0448	2059
BcrDHPH	B	5	PC_PI(3,4)P2_2	NA	2060
BcrDHPH	C	5	PC_PI(3,4)P2_2	0.0101	2061
BcrDHPH	A	2	PC_PI(3,4)P2_2	0.36	2056
BcrDHPH	B	2	PC_PI(3,4)P2_2	0.0394	2057
BcrDHPH	C	2	PC_PI(3,4)P2_2	0.0521	2058
BcrDHPH	A	1	PC_PI(3,4)P2_2	0.0621	2053
BcrDHPH	B	1	PC_PI(3,4)P2_2	0.0388	2054
BcrDHPH	C	1	PC_PI(3,4)P2_2	NA	2055
BcrDHPH	A	0.5	PC_PI(3,4)P2_2	0.0371	2050
BcrDHPH	B	0.5	PC_PI(3,4)P2_2	0.0647	2051
BcrDHPH	C	0.5	PC_PI(3,4)P2_2	0.00121	2052
BcrDHPH	A	5	PC_PI(3,4)P2_4	0.113	2059
BcrDHPH	B	5	PC_PI(3,4)P2_4	0.0798	2060
BcrDHPH	C	5	PC_PI(3,4)P2_4	NA	2061
BcrDHPH	A	2	PC_PI(3,4)P2_4	0.52	2056
BcrDHPH	B	2	PC_PI(3,4)P2_4	NA	2057
BcrDHPH	C	2	PC_PI(3,4)P2_4	0.0638	2058
BcrDHPH	A	1	PC_PI(3,4)P2_4	0.682	2053
BcrDHPH	B	1	PC_PI(3,4)P2_4	0.573	2054
BcrDHPH	C	1	PC_PI(3,4)P2_4	0.201	2055
BcrDHPH	A	0.5	PC_PI(3,4)P2_4	0.224	2050
BcrDHPH	B	0.5	PC_PI(3,4)P2_4	0.143	2051
BcrDHPH	C	0.5	PC_PI(3,4)P2_4	0.000501	2052
BcrDHPH	A	5	PC_PI(3,4)P2_8	1.14	2059
BcrDHPH	B	5	PC_PI(3,4)P2_8	NA	2060
BcrDHPH	C	5	PC_PI(3,4)P2_8	0.00566	2061
BcrDHPH	A	2	PC_PI(3,4)P2_8	0.492	2056
BcrDHPH	B	2	PC_PI(3,4)P2_8	0.678	2057
BcrDHPH	C	2	PC_PI(3,4)P2_8	0.0429	2058
BcrDHPH	A	1	PC_PI(3,4)P2_8	0.488	2053
BcrDHPH	B	1	PC_PI(3,4)P2_8	0.89	2054
BcrDHPH	C	1	PC_PI(3,4)P2_8	0.343	2055
BcrDHPH	A	0.5	PC_PI(3,4)P2_8	0.273	2050
BcrDHPH	B	0.5	PC_PI(3,4)P2_8	0.198	2051
BcrDHPH	C	0.5	PC_PI(3,4)P2_8	0.00518	2052
BcrDHPH	A	5	PC_PI(3,5)P2_10	NA	2059
BcrDHPH	B	5	PC_PI(3,5)P2_10	0.651	2060
BcrDHPH	C	5	PC_PI(3,5)P2_10	0.00676	2061
BcrDHPH	A	2	PC_PI(3,5)P2_10	0.49	2056
BcrDHPH	B	2	PC_PI(3,5)P2_10	0.79	2057
BcrDHPH	C	2	PC_PI(3,5)P2_10	0.0203	2058
BcrDHPH	A	1	PC_PI(3,5)P2_10	0.619	2053
BcrDHPH	B	1	PC_PI(3,5)P2_10	0.451	2054
BcrDHPH	C	1	PC_PI(3,5)P2_10	NA	2055
BcrDHPH	A	0.5	PC_PI(3,5)P2_10	0.271	2050
BcrDHPH	B	0.5	PC_PI(3,5)P2_10	NA	2051
BcrDHPH	C	0.5	PC_PI(3,5)P2_10	NA	2052
BcrDHPH	A	5	PC_PI(3,5)P2_2	0.0687	2059
BcrDHPH	B	5	PC_PI(3,5)P2_2	0.0708	2060
BcrDHPH	C	5	PC_PI(3,5)P2_2	0.00596	2061
BcrDHPH	A	2	PC_PI(3,5)P2_2	0.309	2056
BcrDHPH	B	2	PC_PI(3,5)P2_2	0.0398	2057
BcrDHPH	C	2	PC_PI(3,5)P2_2	0.035	2058
BcrDHPH	A	1	PC_PI(3,5)P2_2	0.0285	2053
BcrDHPH	B	1	PC_PI(3,5)P2_2	0.212	2054
BcrDHPH	C	1	PC_PI(3,5)P2_2	0.141	2055
BcrDHPH	A	0.5	PC_PI(3,5)P2_2	0.0604	2050
BcrDHPH	B	0.5	PC_PI(3,5)P2_2	0.0923	2051
BcrDHPH	C	0.5	PC_PI(3,5)P2_2	0.00392	2052
BcrDHPH	A	5	PC_PI(3,5)P2_4	0.0916	2059
BcrDHPH	B	5	PC_PI(3,5)P2_4	0.0932	2060
BcrDHPH	C	5	PC_PI(3,5)P2_4	0.0143	2061
BcrDHPH	A	2	PC_PI(3,5)P2_4	0.23	2056
BcrDHPH	B	2	PC_PI(3,5)P2_4	0.232	2057
BcrDHPH	C	2	PC_PI(3,5)P2_4	0.0268	2058
BcrDHPH	A	1	PC_PI(3,5)P2_4	0.0354	2053
BcrDHPH	B	1	PC_PI(3,5)P2_4	0.179	2054
BcrDHPH	C	1	PC_PI(3,5)P2_4	0.0728	2055
BcrDHPH	A	0.5	PC_PI(3,5)P2_4	0.15	2050
BcrDHPH	B	0.5	PC_PI(3,5)P2_4	0.15	2051
BcrDHPH	C	0.5	PC_PI(3,5)P2_4	0.000648	2052
BcrDHPH	A	5	PC_PI(3,5)P2_8	0.626	2059
BcrDHPH	B	5	PC_PI(3,5)P2_8	0.45	2060
BcrDHPH	C	5	PC_PI(3,5)P2_8	NA	2061
BcrDHPH	A	2	PC_PI(3,5)P2_8	0.38	2056
BcrDHPH	B	2	PC_PI(3,5)P2_8	0.51	2057
BcrDHPH	C	2	PC_PI(3,5)P2_8	0.226	2058
BcrDHPH	A	1	PC_PI(3,5)P2_8	0.616	2053
BcrDHPH	B	1	PC_PI(3,5)P2_8	0.302	2054
BcrDHPH	C	1	PC_PI(3,5)P2_8	0.235	2055
BcrDHPH	A	0.5	PC_PI(3,5)P2_8	0.0949	2050
BcrDHPH	B	0.5	PC_PI(3,5)P2_8	0.159	2051
BcrDHPH	C	0.5	PC_PI(3,5)P2_8	0.000481	2052
BcrDHPH	A	5	PC_PI3P_10	0.267	2074
BcrDHPH	B	5	PC_PI3P_10	NA	2137
BcrDHPH	C	5	PC_PI3P_10	NA	2138
BcrDHPH	A	2	PC_PI3P_10	0.082	2071
BcrDHPH	B	2	PC_PI3P_10	0.09	2072
BcrDHPH	C	2	PC_PI3P_10	0.086	2073
BcrDHPH	A	1	PC_PI3P_10	0.018	2068
BcrDHPH	B	1	PC_PI3P_10	0.01	2069
BcrDHPH	C	1	PC_PI3P_10	0.014	2070
BcrDHPH	A	0.5	PC_PI3P_10	0.003	2065
BcrDHPH	B	0.5	PC_PI3P_10	0.004	2066
BcrDHPH	C	0.5	PC_PI3P_10	0.003	2067
BcrDHPH	A	5	PC_PI3P_2	0.008	2074
BcrDHPH	B	5	PC_PI3P_2	NA	2137
BcrDHPH	C	5	PC_PI3P_2	NA	2138
BcrDHPH	A	2	PC_PI3P_2	0.007	2071
BcrDHPH	B	2	PC_PI3P_2	0.007	2072
BcrDHPH	C	2	PC_PI3P_2	0.003	2073
BcrDHPH	A	1	PC_PI3P_2	0.004	2068
BcrDHPH	B	1	PC_PI3P_2	0.003	2069
BcrDHPH	C	1	PC_PI3P_2	0.006	2070
BcrDHPH	A	0.5	PC_PI3P_2	0.002	2065
BcrDHPH	B	0.5	PC_PI3P_2	0.002	2066
BcrDHPH	C	0.5	PC_PI3P_2	0.002	2067
BcrDHPH	A	5	PC_PI3P_4	0.031	2074
BcrDHPH	B	5	PC_PI3P_4	NA	2137
BcrDHPH	C	5	PC_PI3P_4	NA	2138
BcrDHPH	A	2	PC_PI3P_4	0.018	2071
BcrDHPH	B	2	PC_PI3P_4	0.024	2072
BcrDHPH	C	2	PC_PI3P_4	0.013	2073
BcrDHPH	A	1	PC_PI3P_4	0.01	2068
BcrDHPH	B	1	PC_PI3P_4	0.005	2069
BcrDHPH	C	1	PC_PI3P_4	0.007	2070
BcrDHPH	A	0.5	PC_PI3P_4	0.005	2065
BcrDHPH	B	0.5	PC_PI3P_4	0.003	2066
BcrDHPH	C	0.5	PC_PI3P_4	0.002	2067
BcrDHPH	A	5	PC_PI3P_8	0.043	2074
BcrDHPH	B	5	PC_PI3P_8	NA	2137
BcrDHPH	C	5	PC_PI3P_8	NA	2138
BcrDHPH	A	2	PC_PI3P_8	0.048	2071
BcrDHPH	B	2	PC_PI3P_8	0.013	2072
BcrDHPH	C	2	PC_PI3P_8	0.014	2073
BcrDHPH	A	1	PC_PI3P_8	0.006	2068
BcrDHPH	B	1	PC_PI3P_8	0.004	2069
BcrDHPH	C	1	PC_PI3P_8	0.006	2070
BcrDHPH	A	0.5	PC_PI3P_8	0.005	2065
BcrDHPH	B	0.5	PC_PI3P_8	0.002	2066
BcrDHPH	C	0.5	PC_PI3P_8	0.003	2067
BcrDHPH	A	5	PC_PI(4,5)P2_10	0.44	2059
BcrDHPH	B	5	PC_PI(4,5)P2_10	0.0266	2060
BcrDHPH	C	5	PC_PI(4,5)P2_10	0.0317	2061
BcrDHPH	A	2	PC_PI(4,5)P2_10	0.528	2056
BcrDHPH	B	2	PC_PI(4,5)P2_10	0.539	2057
BcrDHPH	C	2	PC_PI(4,5)P2_10	NA	2058
BcrDHPH	A	1	PC_PI(4,5)P2_10	0.998	2053
BcrDHPH	B	1	PC_PI(4,5)P2_10	0.0517	2054
BcrDHPH	C	1	PC_PI(4,5)P2_10	0.564	2055
BcrDHPH	A	0.5	PC_PI(4,5)P2_10	0.31	2050
BcrDHPH	B	0.5	PC_PI(4,5)P2_10	0.322	2051
BcrDHPH	C	0.5	PC_PI(4,5)P2_10	0.000779	2052
BcrDHPH	A	5	PC_PI(4,5)P2_2	0.0589	2059
BcrDHPH	B	5	PC_PI(4,5)P2_2	0.0263	2060
BcrDHPH	C	5	PC_PI(4,5)P2_2	0.00991	2061
BcrDHPH	A	2	PC_PI(4,5)P2_2	0.102	2056
BcrDHPH	B	2	PC_PI(4,5)P2_2	0.275	2057
BcrDHPH	C	2	PC_PI(4,5)P2_2	0.0222	2058
BcrDHPH	A	1	PC_PI(4,5)P2_2	0.762	2053
BcrDHPH	B	1	PC_PI(4,5)P2_2	0.0131	2054
BcrDHPH	C	1	PC_PI(4,5)P2_2	0.0859	2055
BcrDHPH	A	0.5	PC_PI(4,5)P2_2	0.0138	2050
BcrDHPH	B	0.5	PC_PI(4,5)P2_2	0.0257	2051
BcrDHPH	C	0.5	PC_PI(4,5)P2_2	0.000589	2052
BcrDHPH	A	5	PC_PI(4,5)P2_4	0.617	2059
BcrDHPH	B	5	PC_PI(4,5)P2_4	0.367	2060
BcrDHPH	C	5	PC_PI(4,5)P2_4	0.0119	2061
BcrDHPH	A	2	PC_PI(4,5)P2_4	0.731	2056
BcrDHPH	B	2	PC_PI(4,5)P2_4	0.36	2057
BcrDHPH	C	2	PC_PI(4,5)P2_4	0.0517	2058
BcrDHPH	A	1	PC_PI(4,5)P2_4	0.311	2053
BcrDHPH	B	1	PC_PI(4,5)P2_4	0.378	2054
BcrDHPH	C	1	PC_PI(4,5)P2_4	0.568	2055
BcrDHPH	A	0.5	PC_PI(4,5)P2_4	0.287	2050
BcrDHPH	B	0.5	PC_PI(4,5)P2_4	0.492	2051
BcrDHPH	C	0.5	PC_PI(4,5)P2_4	NA	2052
BcrDHPH	A	5	PC_PI(4,5)P2_8	0.0492	2059
BcrDHPH	B	5	PC_PI(4,5)P2_8	0.102	2060
BcrDHPH	C	5	PC_PI(4,5)P2_8	0.0886	2061
BcrDHPH	A	2	PC_PI(4,5)P2_8	0.234	2056
BcrDHPH	B	2	PC_PI(4,5)P2_8	0.476	2057
BcrDHPH	C	2	PC_PI(4,5)P2_8	0.491	2058
BcrDHPH	A	1	PC_PI(4,5)P2_8	0.343	2053
BcrDHPH	B	1	PC_PI(4,5)P2_8	0.543	2054
BcrDHPH	C	1	PC_PI(4,5)P2_8	0.0557	2055
BcrDHPH	A	0.5	PC_PI(4,5)P2_8	0.217	2050
BcrDHPH	B	0.5	PC_PI(4,5)P2_8	0.099	2051
BcrDHPH	C	0.5	PC_PI(4,5)P2_8	0.000922	2052
BcrDHPH	A	5	PC_PI5P_10	0.236	2074
BcrDHPH	B	5	PC_PI5P_10	NA	2137
BcrDHPH	C	5	PC_PI5P_10	NA	2138
BcrDHPH	A	2	PC_PI5P_10	0.048	2071
BcrDHPH	B	2	PC_PI5P_10	0.066	2072
BcrDHPH	C	2	PC_PI5P_10	0.048	2073
BcrDHPH	A	1	PC_PI5P_10	0.012	2068
BcrDHPH	B	1	PC_PI5P_10	0.014	2069
BcrDHPH	C	1	PC_PI5P_10	0.01	2070
BcrDHPH	A	0.5	PC_PI5P_10	0.005	2065
BcrDHPH	B	0.5	PC_PI5P_10	0.004	2066
BcrDHPH	C	0.5	PC_PI5P_10	0.002	2067
BcrDHPH	A	5	PC_PI5P_2	0.008	2074
BcrDHPH	B	5	PC_PI5P_2	NA	2137
BcrDHPH	C	5	PC_PI5P_2	NA	2138
BcrDHPH	A	2	PC_PI5P_2	0.009	2071
BcrDHPH	B	2	PC_PI5P_2	0.005	2072
BcrDHPH	C	2	PC_PI5P_2	0.003	2073
BcrDHPH	A	1	PC_PI5P_2	0.003	2068
BcrDHPH	B	1	PC_PI5P_2	0.003	2069
BcrDHPH	C	1	PC_PI5P_2	0.008	2070
BcrDHPH	A	0.5	PC_PI5P_2	0.003	2065
BcrDHPH	B	0.5	PC_PI5P_2	0.003	2066
BcrDHPH	C	0.5	PC_PI5P_2	0.002	2067
BcrDHPH	A	5	PC_PI5P_4	0.092	2074
BcrDHPH	B	5	PC_PI5P_4	NA	2137
BcrDHPH	C	5	PC_PI5P_4	NA	2138
BcrDHPH	A	2	PC_PI5P_4	0.017	2071
BcrDHPH	B	2	PC_PI5P_4	0.015	2072
BcrDHPH	C	2	PC_PI5P_4	0.018	2073
BcrDHPH	A	1	PC_PI5P_4	0.007	2068
BcrDHPH	B	1	PC_PI5P_4	0.003	2069
BcrDHPH	C	1	PC_PI5P_4	0.006	2070
BcrDHPH	A	0.5	PC_PI5P_4	0.003	2065
BcrDHPH	B	0.5	PC_PI5P_4	0.003	2066
BcrDHPH	C	0.5	PC_PI5P_4	0.003	2067
BcrDHPH	A	5	PC_PI5P_8	0.012	2074
BcrDHPH	B	5	PC_PI5P_8	NA	2137
BcrDHPH	C	5	PC_PI5P_8	NA	2138
BcrDHPH	A	2	PC_PI5P_8	0.012	2071
BcrDHPH	B	2	PC_PI5P_8	0.006	2072
BcrDHPH	C	2	PC_PI5P_8	0.007	2073
BcrDHPH	A	1	PC_PI5P_8	0.004	2068
BcrDHPH	B	1	PC_PI5P_8	0.004	2069
BcrDHPH	C	1	PC_PI5P_8	0.006	2070
BcrDHPH	A	0.5	PC_PI5P_8	0.003	2065
BcrDHPH	B	0.5	PC_PI5P_8	0.004	2066
BcrDHPH	C	0.5	PC_PI5P_8	0.003	2067
BcrDHPH	A	5	PC_PS_10	0.352	2059
BcrDHPH	B	5	PC_PS_10	0.0949	2060
BcrDHPH	C	5	PC_PS_10	0.00928	2061
BcrDHPH	D	5	PC_PS_10	0.018	2074
BcrDHPH	E	5	PC_PS_10	NA	2137
BcrDHPH	F	5	PC_PS_10	NA	2138
BcrDHPH	A	2	PC_PS_10	0.106	2056
BcrDHPH	B	2	PC_PS_10	0.762	2057
BcrDHPH	C	2	PC_PS_10	0.419	2058
BcrDHPH	D	2	PC_PS_10	0.03	2071
BcrDHPH	E	2	PC_PS_10	0.028	2072
BcrDHPH	F	2	PC_PS_10	0.031	2073
BcrDHPH	A	1	PC_PS_10	0.0157	2053
BcrDHPH	B	1	PC_PS_10	0.125	2054
BcrDHPH	C	1	PC_PS_10	0.149	2055
BcrDHPH	D	1	PC_PS_10	0.06	2068
BcrDHPH	E	1	PC_PS_10	0.046	2069
BcrDHPH	F	1	PC_PS_10	0.041	2070
BcrDHPH	A	0.5	PC_PS_10	0.0596	2050
BcrDHPH	B	0.5	PC_PS_10	0.405	2051
BcrDHPH	C	0.5	PC_PS_10	0.000638	2052
BcrDHPH	D	0.5	PC_PS_10	0.02	2065
BcrDHPH	E	0.5	PC_PS_10	0.013	2066
BcrDHPH	F	0.5	PC_PS_10	0.007	2067
BcrDHPH	A	5	PC_LPA_10	0.0358	2059
BcrDHPH	B	5	PC_LPA_10	0.0209	2060
BcrDHPH	C	5	PC_LPA_10	0.0054	2061
BcrDHPH	D	5	PC_LPA_10	0.029	2074
BcrDHPH	E	5	PC_LPA_10	NA	2137
BcrDHPH	F	5	PC_LPA_10	NA	2138
BcrDHPH	A	2	PC_LPA_10	0.0169	2056
BcrDHPH	B	2	PC_LPA_10	NA	2057
BcrDHPH	C	2	PC_LPA_10	0.109	2058
BcrDHPH	D	2	PC_LPA_10	0.006	2071
BcrDHPH	E	2	PC_LPA_10	0.015	2072
BcrDHPH	F	2	PC_LPA_10	0.016	2073
BcrDHPH	A	1	PC_LPA_10	0.011	2053
BcrDHPH	B	1	PC_LPA_10	0.00497	2054
BcrDHPH	C	1	PC_LPA_10	0.0235	2055
BcrDHPH	D	1	PC_LPA_10	0.009	2068
BcrDHPH	E	1	PC_LPA_10	0.006	2069
BcrDHPH	F	1	PC_LPA_10	0.005	2070
BcrDHPH	A	0.5	PC_LPA_10	0.00409	2050
BcrDHPH	B	0.5	PC_LPA_10	0.0182	2051
BcrDHPH	C	0.5	PC_LPA_10	0.00221	2052
BcrDHPH	D	0.5	PC_LPA_10	0.003	2065
BcrDHPH	E	0.5	PC_LPA_10	0.003	2066
BcrDHPH	F	0.5	PC_LPA_10	0.004	2067
BcrDHPH	A	5	PC_LPC_10	0.0198	2059
BcrDHPH	B	5	PC_LPC_10	0.0204	2060
BcrDHPH	C	5	PC_LPC_10	0.00839	2061
BcrDHPH	D	5	PC_LPC_10	0.004	2074
BcrDHPH	E	5	PC_LPC_10	NA	2137
BcrDHPH	F	5	PC_LPC_10	NA	2138
BcrDHPH	A	2	PC_LPC_10	0.0162	2056
BcrDHPH	B	2	PC_LPC_10	0.015	2057
BcrDHPH	C	2	PC_LPC_10	0.215	2058
BcrDHPH	D	2	PC_LPC_10	0.008	2071
BcrDHPH	E	2	PC_LPC_10	0.005	2072
BcrDHPH	F	2	PC_LPC_10	0.004	2073
BcrDHPH	A	1	PC_LPC_10	0.00394	2053
BcrDHPH	B	1	PC_LPC_10	0.00434	2054
BcrDHPH	C	1	PC_LPC_10	0.0036	2055
BcrDHPH	D	1	PC_LPC_10	0.002	2068
BcrDHPH	E	1	PC_LPC_10	0.004	2069
BcrDHPH	F	1	PC_LPC_10	0.008	2070
BcrDHPH	A	0.5	PC_LPC_10	0.00262	2050
BcrDHPH	B	0.5	PC_LPC_10	0.0049	2051
BcrDHPH	C	0.5	PC_LPC_10	0.000646	2052
BcrDHPH	D	0.5	PC_LPC_10	0.003	2065
BcrDHPH	E	0.5	PC_LPC_10	0.004	2066
BcrDHPH	F	0.5	PC_LPC_10	0.003	2067
BcrDHPH	A	5	PC_PI4P_10	0.07	2074
BcrDHPH	B	5	PC_PI4P_10	NA	2137
BcrDHPH	C	5	PC_PI4P_10	NA	2138
BcrDHPH	A	2	PC_PI4P_10	0.033	2071
BcrDHPH	B	2	PC_PI4P_10	0.064	2072
BcrDHPH	C	2	PC_PI4P_10	0.011	2073
BcrDHPH	A	1	PC_PI4P_10	0.009	2068
BcrDHPH	B	1	PC_PI4P_10	0.021	2069
BcrDHPH	C	1	PC_PI4P_10	0.008	2070
BcrDHPH	A	0.5	PC_PI4P_10	0.003	2065
BcrDHPH	B	0.5	PC_PI4P_10	0.012	2066
BcrDHPH	C	0.5	PC_PI4P_10	0.003	2067
BcrDHPH	A	5	PC_PI4P_2	0.008	2074
BcrDHPH	B	5	PC_PI4P_2	NA	2137
BcrDHPH	C	5	PC_PI4P_2	NA	2138
BcrDHPH	A	2	PC_PI4P_2	0.008	2071
BcrDHPH	B	2	PC_PI4P_2	0.009	2072
BcrDHPH	C	2	PC_PI4P_2	0.004	2073
BcrDHPH	A	1	PC_PI4P_2	0.004	2068
BcrDHPH	B	1	PC_PI4P_2	0.01	2069
BcrDHPH	C	1	PC_PI4P_2	0.008	2070
BcrDHPH	A	0.5	PC_PI4P_2	0.003	2065
BcrDHPH	B	0.5	PC_PI4P_2	0.003	2066
BcrDHPH	C	0.5	PC_PI4P_2	0.003	2067
BcrDHPH	A	5	PC_PI4P_4	0.043	2074
BcrDHPH	B	5	PC_PI4P_4	NA	2137
BcrDHPH	C	5	PC_PI4P_4	NA	2138
BcrDHPH	A	2	PC_PI4P_4	0.086	2071
BcrDHPH	B	2	PC_PI4P_4	0.061	2072
BcrDHPH	C	2	PC_PI4P_4	0.014	2073
BcrDHPH	A	1	PC_PI4P_4	0.024	2068
BcrDHPH	B	1	PC_PI4P_4	0.015	2069
BcrDHPH	C	1	PC_PI4P_4	0.01	2070
BcrDHPH	A	0.5	PC_PI4P_4	0.005	2065
BcrDHPH	B	0.5	PC_PI4P_4	0.004	2066
BcrDHPH	C	0.5	PC_PI4P_4	0.003	2067
BcrDHPH	A	5	PC_PI4P_8	0.078	2074
BcrDHPH	B	5	PC_PI4P_8	NA	2137
BcrDHPH	C	5	PC_PI4P_8	NA	2138
BcrDHPH	A	2	PC_PI4P_8	0.018	2071
BcrDHPH	B	2	PC_PI4P_8	0.02	2072
BcrDHPH	C	2	PC_PI4P_8	0.012	2073
BcrDHPH	A	1	PC_PI4P_8	0.008	2068
BcrDHPH	B	1	PC_PI4P_8	0.011	2069
BcrDHPH	C	1	PC_PI4P_8	0.005	2070
BcrDHPH	A	0.5	PC_PI4P_8	0.01	2065
BcrDHPH	B	0.5	PC_PI4P_8	0.004	2066
BcrDHPH	C	0.5	PC_PI4P_8	0.002	2067
BcrDHPH	A	5	PC_S1P_10	0.027	2059
BcrDHPH	B	5	PC_S1P_10	0.02	2060
BcrDHPH	C	5	PC_S1P_10	0.0152	2061
BcrDHPH	D	5	PC_S1P_10	0.005	2074
BcrDHPH	E	5	PC_S1P_10	NA	2137
BcrDHPH	F	5	PC_S1P_10	NA	2138
BcrDHPH	A	2	PC_S1P_10	0.0139	2056
BcrDHPH	B	2	PC_S1P_10	0.0105	2057
BcrDHPH	C	2	PC_S1P_10	0.0281	2058
BcrDHPH	D	2	PC_S1P_10	0.006	2071
BcrDHPH	E	2	PC_S1P_10	0.006	2072
BcrDHPH	F	2	PC_S1P_10	0.004	2073
BcrDHPH	A	1	PC_S1P_10	0.00604	2053
BcrDHPH	B	1	PC_S1P_10	0.00452	2054
BcrDHPH	C	1	PC_S1P_10	0.00488	2055
BcrDHPH	D	1	PC_S1P_10	0.004	2068
BcrDHPH	E	1	PC_S1P_10	0.003	2069
BcrDHPH	F	1	PC_S1P_10	0.005	2070
BcrDHPH	A	0.5	PC_S1P_10	0.00723	2050
BcrDHPH	B	0.5	PC_S1P_10	0.00506	2051
BcrDHPH	C	0.5	PC_S1P_10	0.00197	2052
BcrDHPH	D	0.5	PC_S1P_10	0.004	2065
BcrDHPH	E	0.5	PC_S1P_10	0.005	2066
BcrDHPH	F	0.5	PC_S1P_10	0.004	2067
BcrPH	A1	5	PC	0.33	2007
BcrPH	A2	5	PC	0.00368	2007
BcrPH	A3	5	PC	0.269	2007
BcrPH	B1	5	PC	0.021	2008
BcrPH	B2	5	PC	0.224	2008
BcrPH	B3	5	PC	0.162	2008
BcrPH	C1	5	PC	0.011	2018
BcrPH	C2	5	PC	0.025	2018
BcrPH	C3	5	PC	0.019	2018
BcrPH	D1	5	PC	0.013	2019
BcrPH	D2	5	PC	0.018	2019
BcrPH	D3	5	PC	0.011	2019
BcrPH	E1	5	PC	0.02	2111
BcrPH	E2	5	PC	0.038	2111
BcrPH	E3	5	PC	0.005	2111
BcrPH	A1	2	PC	NA	2005
BcrPH	A2	2	PC	0.00525	2005
BcrPH	A3	2	PC	0.00463	2005
BcrPH	B1	2	PC	0.0121	2006
BcrPH	B2	2	PC	0.00387	2006
BcrPH	B3	2	PC	0.0229	2006
BcrPH	C1	2	PC	0.007	2016
BcrPH	C2	2	PC	0.007	2016
BcrPH	C3	2	PC	NA	2016
BcrPH	D1	2	PC	0.008	2017
BcrPH	D2	2	PC	0.008	2017
BcrPH	D3	2	PC	0.009	2017
BcrPH	E1	2	PC	0.01	2112
BcrPH	E2	2	PC	0.013	2112
BcrPH	E3	2	PC	0.012	2112
BcrPH	A1	1	PC	0.00232	2002
BcrPH	A2	1	PC	0.0418	2002
BcrPH	A3	1	PC	NA	2002
BcrPH	B1	1	PC	NA	2003
BcrPH	B2	1	PC	0.0127	2003
BcrPH	B3	1	PC	0.0141	2003
BcrPH	C1	1	PC	0.0898	2004
BcrPH	C2	1	PC	0.013	2004
BcrPH	C3	1	PC	0.00505	2004
BcrPH	D1	1	PC	0.006	2014
BcrPH	D2	1	PC	0.005	2014
BcrPH	D3	1	PC	0.008	2014
BcrPH	E1	1	PC	0.012	2015
BcrPH	E2	1	PC	0.026	2015
BcrPH	E3	1	PC	0.011	2015
BcrPH	F1	1	PC	0.003	2113
BcrPH	F2	1	PC	0.008	2113
BcrPH	F3	1	PC	0.008	2113
BcrPH	A1	0.5	PC	NA	1999
BcrPH	A2	0.5	PC	0.0291	1999
BcrPH	A3	0.5	PC	NA	1999
BcrPH	B1	0.5	PC	0.00539	2000
BcrPH	B2	0.5	PC	0.00224	2000
BcrPH	B3	0.5	PC	0.00556	2000
BcrPH	C1	0.5	PC	0.00361	2001
BcrPH	C2	0.5	PC	0.00302	2001
BcrPH	C3	0.5	PC	0.0157	2001
BcrPH	D1	0.5	PC	0.004	2012
BcrPH	D2	0.5	PC	0.005	2012
BcrPH	D3	0.5	PC	0.005	2012
BcrPH	E1	0.5	PC	0.004	2013
BcrPH	E2	0.5	PC	0.007	2013
BcrPH	E3	0.5	PC	0.002	2013
BcrPH	F1	0.5	PC	NA	2114
BcrPH	F2	0.5	PC	NA	2114
BcrPH	F3	0.5	PC	NA	2114
BcrPH	A1	0.1	PC	0.000936	2107
BcrPH	A2	0.1	PC	0.00145	2107
BcrPH	A3	0.1	PC	0.00259	2107
BcrPH	B1	0.1	PC	0.000858	2108
BcrPH	B2	0.1	PC	0.00277	2108
BcrPH	B3	0.1	PC	0.0034	2108
BcrPH	C1	0.1	PC	0.000643	2109
BcrPH	C2	0.1	PC	0.00103	2109
BcrPH	C3	0.1	PC	0.00174	2109
BcrPH	D1	0.1	PC	NA	2115
BcrPH	D2	0.1	PC	NA	2115
BcrPH	D3	0.1	PC	NA	2115
BcrPH	E1	0.1	PC	NA	2116
BcrPH	E2	0.1	PC	NA	2116
BcrPH	E3	0.1	PC	NA	2116
BcrPH	F1	0.1	PC	0.002	2117
BcrPH	F2	0.1	PC	0.002	2117
BcrPH	F3	0.1	PC	0.002	2117
BcrPH	A	5	PC_PA_10	0.138	2007
BcrPH	B	5	PC_PA_10	0.0393	2008
BcrPH	C	5	PC_PA_10	0.197	2018
BcrPH	D	5	PC_PA_10	0.065	2019
BcrPH	E	5	PC_PA_10	0.014	2111
BcrPH	A	2	PC_PA_10	0.0253	2005
BcrPH	B	2	PC_PA_10	0.0193	2006
BcrPH	C	2	PC_PA_10	0.058	2016
BcrPH	D	2	PC_PA_10	0.039	2017
BcrPH	E	2	PC_PA_10	NA	2112
BcrPH	A	1	PC_PA_10	0.00874	2002
BcrPH	B	1	PC_PA_10	0.0156	2003
BcrPH	C	1	PC_PA_10	0.154	2004
BcrPH	D	1	PC_PA_10	0.018	2014
BcrPH	E	1	PC_PA_10	0.027	2015
BcrPH	F	1	PC_PA_10	0.027	2113
BcrPH	A	0.5	PC_PA_10	0.00255	1999
BcrPH	B	0.5	PC_PA_10	0.0135	2000
BcrPH	C	0.5	PC_PA_10	0.0252	2001
BcrPH	D	0.5	PC_PA_10	0.035	2012
BcrPH	E	0.5	PC_PA_10	0.008	2013
BcrPH	F	0.5	PC_PA_10	NA	2114
BcrPH	A	0.1	PC_PA_10	0.00221	2107
BcrPH	B	0.1	PC_PA_10	0.00446	2108
BcrPH	C	0.1	PC_PA_10	0.00104	2109
BcrPH	D	0.1	PC_PA_10	NA	2115
BcrPH	E	0.1	PC_PA_10	NA	2116
BcrPH	F	0.1	PC_PA_10	0.003	2117
BcrPH	A	5	PC_PE_10	0.00844	2007
BcrPH	B	5	PC_PE_10	0.0101	2008
BcrPH	C	5	PC_PE_10	0.035	2018
BcrPH	D	5	PC_PE_10	0.043	2019
BcrPH	E	5	PC_PE_10	0.009	2111
BcrPH	A	2	PC_PE_10	0.0102	2005
BcrPH	B	2	PC_PE_10	0.0186	2006
BcrPH	C	2	PC_PE_10	0.049	2016
BcrPH	D	2	PC_PE_10	0.072	2017
BcrPH	E	2	PC_PE_10	0.011	2112
BcrPH	A	1	PC_PE_10	NA	2002
BcrPH	B	1	PC_PE_10	0.0104	2003
BcrPH	C	1	PC_PE_10	0.0393	2004
BcrPH	D	1	PC_PE_10	0.017	2014
BcrPH	E	1	PC_PE_10	0.016	2015
BcrPH	F	1	PC_PE_10	0.005	2113
BcrPH	A	0.5	PC_PE_10	0.00919	1999
BcrPH	B	0.5	PC_PE_10	0.00953	2000
BcrPH	C	0.5	PC_PE_10	0.0303	2001
BcrPH	D	0.5	PC_PE_10	0.012	2012
BcrPH	E	0.5	PC_PE_10	0.006	2013
BcrPH	F	0.5	PC_PE_10	NA	2114
BcrPH	A	0.1	PC_PE_10	0.00243	2107
BcrPH	B	0.1	PC_PE_10	0.00423	2108
BcrPH	C	0.1	PC_PE_10	0.000797	2109
BcrPH	D	0.1	PC_PE_10	NA	2115
BcrPH	E	0.1	PC_PE_10	NA	2116
BcrPH	F	0.1	PC_PE_10	NA	2117
BcrPH	A	5	PC_PI_10	0.0654	2007
BcrPH	B	5	PC_PI_10	0.00599	2008
BcrPH	C	5	PC_PI_10	0.016	2018
BcrPH	D	5	PC_PI_10	0.021	2019
BcrPH	E	5	PC_PI_10	0.02	2111
BcrPH	A	2	PC_PI_10	0.0273	2005
BcrPH	B	2	PC_PI_10	0.106	2006
BcrPH	C	2	PC_PI_10	0.019	2016
BcrPH	D	2	PC_PI_10	0.028	2017
BcrPH	E	2	PC_PI_10	0.03	2112
BcrPH	A	1	PC_PI_10	0.0052	2002
BcrPH	B	1	PC_PI_10	0.0929	2003
BcrPH	C	1	PC_PI_10	NA	2004
BcrPH	D	1	PC_PI_10	0.01	2014
BcrPH	E	1	PC_PI_10	0.011	2015
BcrPH	F	1	PC_PI_10	0.004	2113
BcrPH	A	0.5	PC_PI_10	0.00417	1999
BcrPH	B	0.5	PC_PI_10	0.0257	2000
BcrPH	C	0.5	PC_PI_10	0.00941	2001
BcrPH	D	0.5	PC_PI_10	0.007	2012
BcrPH	E	0.5	PC_PI_10	0.005	2013
BcrPH	F	0.5	PC_PI_10	NA	2114
BcrPH	A	0.1	PC_PI_10	0.00121	2107
BcrPH	B	0.1	PC_PI_10	0.00325	2108
BcrPH	C	0.1	PC_PI_10	0.00102	2109
BcrPH	D	0.1	PC_PI_10	NA	2115
BcrPH	E	0.1	PC_PI_10	NA	2116
BcrPH	F	0.1	PC_PI_10	0.001	2117
BcrPH	A	5	PC_PI(3,4,5)P3_10	NA	2007
BcrPH	B	5	PC_PI(3,4,5)P3_10	0.682	2008
BcrPH	A	2	PC_PI(3,4,5)P3_10	0.304	2005
BcrPH	B	2	PC_PI(3,4,5)P3_10	1.3	2006
BcrPH	A	1	PC_PI(3,4,5)P3_10	NA	2002
BcrPH	B	1	PC_PI(3,4,5)P3_10	0.937	2003
BcrPH	C	1	PC_PI(3,4,5)P3_10	NA	2004
BcrPH	A	0.5	PC_PI(3,4,5)P3_10	0.195	1999
BcrPH	B	0.5	PC_PI(3,4,5)P3_10	0.189	2000
BcrPH	C	0.5	PC_PI(3,4,5)P3_10	NA	2001
BcrPH	A	0.1	PC_PI(3,4,5)P3_10	0.000501	2107
BcrPH	B	0.1	PC_PI(3,4,5)P3_10	0.00121	2108
BcrPH	C	0.1	PC_PI(3,4,5)P3_10	NA	2109
BcrPH	A	5	PC_PI(3,4,5)P3_2	0.0781	2007
BcrPH	B	5	PC_PI(3,4,5)P3_2	0.668	2008
BcrPH	A	2	PC_PI(3,4,5)P3_2	0.171	2005
BcrPH	B	2	PC_PI(3,4,5)P3_2	NA	2006
BcrPH	A	1	PC_PI(3,4,5)P3_2	NA	2002
BcrPH	B	1	PC_PI(3,4,5)P3_2	0.00795	2003
BcrPH	C	1	PC_PI(3,4,5)P3_2	0.0163	2004
BcrPH	A	0.5	PC_PI(3,4,5)P3_2	0.0768	1999
BcrPH	B	0.5	PC_PI(3,4,5)P3_2	0.00372	2000
BcrPH	C	0.5	PC_PI(3,4,5)P3_2	0.00324	2001
BcrPH	A	0.1	PC_PI(3,4,5)P3_2	0.00112	2107
BcrPH	B	0.1	PC_PI(3,4,5)P3_2	0.00298	2108
BcrPH	C	0.1	PC_PI(3,4,5)P3_2	0.00794	2109
BcrPH	A	5	PC_PI(3,4,5)P3_4	1.43	2007
BcrPH	B	5	PC_PI(3,4,5)P3_4	NA	2008
BcrPH	A	2	PC_PI(3,4,5)P3_4	0.841	2005
BcrPH	B	2	PC_PI(3,4,5)P3_4	0.95	2006
BcrPH	A	1	PC_PI(3,4,5)P3_4	0.432	2002
BcrPH	B	1	PC_PI(3,4,5)P3_4	0.76	2003
BcrPH	C	1	PC_PI(3,4,5)P3_4	0.28	2004
BcrPH	A	0.5	PC_PI(3,4,5)P3_4	NA	1999
BcrPH	B	0.5	PC_PI(3,4,5)P3_4	0.19	2000
BcrPH	C	0.5	PC_PI(3,4,5)P3_4	0.0164	2001
BcrPH	A	0.1	PC_PI(3,4,5)P3_4	0.0012	2107
BcrPH	B	0.1	PC_PI(3,4,5)P3_4	0.00159	2108
BcrPH	C	0.1	PC_PI(3,4,5)P3_4	0.000607	2109
BcrPH	A	5	PC_PI(3,4,5)P3_8	NA	2007
BcrPH	B	5	PC_PI(3,4,5)P3_8	0.782	2008
BcrPH	A	2	PC_PI(3,4,5)P3_8	0.418	2005
BcrPH	B	2	PC_PI(3,4,5)P3_8	NA	2006
BcrPH	A	1	PC_PI(3,4,5)P3_8	0.305	2002
BcrPH	B	1	PC_PI(3,4,5)P3_8	0.249	2003
BcrPH	C	1	PC_PI(3,4,5)P3_8	NA	2004
BcrPH	A	0.5	PC_PI(3,4,5)P3_8	0.14	1999
BcrPH	B	0.5	PC_PI(3,4,5)P3_8	0.163	2000
BcrPH	C	0.5	PC_PI(3,4,5)P3_8	NA	2001
BcrPH	A	0.1	PC_PI(3,4,5)P3_8	0.00107	2107
BcrPH	B	0.1	PC_PI(3,4,5)P3_8	NA	2108
BcrPH	C	0.1	PC_PI(3,4,5)P3_8	0.000587	2109
BcrPH	A	5	PC_PI(3,4)P2_10	0.752	2007
BcrPH	B	5	PC_PI(3,4)P2_10	1.41	2008
BcrPH	A	2	PC_PI(3,4)P2_10	0.963	2005
BcrPH	B	2	PC_PI(3,4)P2_10	1	2006
BcrPH	A	1	PC_PI(3,4)P2_10	0.561	2002
BcrPH	B	1	PC_PI(3,4)P2_10	NA	2003
BcrPH	C	1	PC_PI(3,4)P2_10	0.395	2004
BcrPH	A	0.5	PC_PI(3,4)P2_10	0.652	1999
BcrPH	B	0.5	PC_PI(3,4)P2_10	0.45	2000
BcrPH	C	0.5	PC_PI(3,4)P2_10	0.037	2001
BcrPH	A	0.1	PC_PI(3,4)P2_10	0.00146	2107
BcrPH	B	0.1	PC_PI(3,4)P2_10	0.0011	2108
BcrPH	C	0.1	PC_PI(3,4)P2_10	0.00979	2109
BcrPH	A	5	PC_PI(3,4)P2_2	1.01	2007
BcrPH	B	5	PC_PI(3,4)P2_2	0.564	2008
BcrPH	A	2	PC_PI(3,4)P2_2	NA	2005
BcrPH	B	2	PC_PI(3,4)P2_2	0.713	2006
BcrPH	A	1	PC_PI(3,4)P2_2	0.195	2002
BcrPH	B	1	PC_PI(3,4)P2_2	0.00632	2003
BcrPH	C	1	PC_PI(3,4)P2_2	0.119	2004
BcrPH	A	0.5	PC_PI(3,4)P2_2	0.0097	1999
BcrPH	B	0.5	PC_PI(3,4)P2_2	0.0695	2000
BcrPH	C	0.5	PC_PI(3,4)P2_2	0.0129	2001
BcrPH	A	0.1	PC_PI(3,4)P2_2	0.0013	2107
BcrPH	B	0.1	PC_PI(3,4)P2_2	0.00105	2108
BcrPH	C	0.1	PC_PI(3,4)P2_2	0.00228	2109
BcrPH	A	5	PC_PI(3,4)P2_4	1.33	2007
BcrPH	B	5	PC_PI(3,4)P2_4	0.767	2008
BcrPH	A	2	PC_PI(3,4)P2_4	NA	2005
BcrPH	B	2	PC_PI(3,4)P2_4	1.26	2006
BcrPH	A	1	PC_PI(3,4)P2_4	NA	2002
BcrPH	B	1	PC_PI(3,4)P2_4	0.163	2003
BcrPH	C	1	PC_PI(3,4)P2_4	0.329	2004
BcrPH	A	0.5	PC_PI(3,4)P2_4	0.133	1999
BcrPH	B	0.5	PC_PI(3,4)P2_4	0.0834	2000
BcrPH	C	0.5	PC_PI(3,4)P2_4	0.0306	2001
BcrPH	A	0.1	PC_PI(3,4)P2_4	0.000694	2107
BcrPH	B	0.1	PC_PI(3,4)P2_4	0.00194	2108
BcrPH	C	0.1	PC_PI(3,4)P2_4	0.00203	2109
BcrPH	A	5	PC_PI(3,4)P2_8	NA	2007
BcrPH	B	5	PC_PI(3,4)P2_8	NA	2008
BcrPH	A	2	PC_PI(3,4)P2_8	NA	2005
BcrPH	B	2	PC_PI(3,4)P2_8	NA	2006
BcrPH	A	1	PC_PI(3,4)P2_8	NA	2002
BcrPH	B	1	PC_PI(3,4)P2_8	NA	2003
BcrPH	C	1	PC_PI(3,4)P2_8	NA	2004
BcrPH	A	0.5	PC_PI(3,4)P2_8	NA	1999
BcrPH	B	0.5	PC_PI(3,4)P2_8	NA	2000
BcrPH	C	0.5	PC_PI(3,4)P2_8	NA	2001
BcrPH	A	0.1	PC_PI(3,4)P2_8	0.00118	2107
BcrPH	B	0.1	PC_PI(3,4)P2_8	0.000881	2108
BcrPH	C	0.1	PC_PI(3,4)P2_8	0.0065	2109
BcrPH	A	5	PC_PI(3,5)P2_10	0.89	2007
BcrPH	B	5	PC_PI(3,5)P2_10	NA	2008
BcrPH	A	2	PC_PI(3,5)P2_10	0.897	2005
BcrPH	B	2	PC_PI(3,5)P2_10	1.03	2006
BcrPH	A	1	PC_PI(3,5)P2_10	0.218	2002
BcrPH	B	1	PC_PI(3,5)P2_10	0.608	2003
BcrPH	C	1	PC_PI(3,5)P2_10	0.235	2004
BcrPH	A	0.5	PC_PI(3,5)P2_10	0.237	1999
BcrPH	B	0.5	PC_PI(3,5)P2_10	0.238	2000
BcrPH	C	0.5	PC_PI(3,5)P2_10	0.0172	2001
BcrPH	A	0.1	PC_PI(3,5)P2_10	0.00103	2107
BcrPH	B	0.1	PC_PI(3,5)P2_10	0.000936	2108
BcrPH	C	0.1	PC_PI(3,5)P2_10	0.00198	2109
BcrPH	A	5	PC_PI(3,5)P2_2	NA	2007
BcrPH	B	5	PC_PI(3,5)P2_2	0.108	2008
BcrPH	A	2	PC_PI(3,5)P2_2	0.234	2005
BcrPH	B	2	PC_PI(3,5)P2_2	0.569	2006
BcrPH	A	1	PC_PI(3,5)P2_2	0.0216	2002
BcrPH	B	1	PC_PI(3,5)P2_2	0.1	2003
BcrPH	C	1	PC_PI(3,5)P2_2	NA	2004
BcrPH	A	0.5	PC_PI(3,5)P2_2	0.0524	1999
BcrPH	B	0.5	PC_PI(3,5)P2_2	0.0511	2000
BcrPH	C	0.5	PC_PI(3,5)P2_2	NA	2001
BcrPH	A	0.1	PC_PI(3,5)P2_2	0.00147	2107
BcrPH	B	0.1	PC_PI(3,5)P2_2	0.00157	2108
BcrPH	C	0.1	PC_PI(3,5)P2_2	0.000832	2109
BcrPH	A	5	PC_PI(3,5)P2_4	NA	2007
BcrPH	B	5	PC_PI(3,5)P2_4	0.029	2008
BcrPH	A	2	PC_PI(3,5)P2_4	0.0944	2005
BcrPH	B	2	PC_PI(3,5)P2_4	NA	2006
BcrPH	A	1	PC_PI(3,5)P2_4	NA	2002
BcrPH	B	1	PC_PI(3,5)P2_4	0.0369	2003
BcrPH	C	1	PC_PI(3,5)P2_4	NA	2004
BcrPH	A	0.5	PC_PI(3,5)P2_4	0.009	1999
BcrPH	B	0.5	PC_PI(3,5)P2_4	0.0234	2000
BcrPH	C	0.5	PC_PI(3,5)P2_4	NA	2001
BcrPH	A	0.1	PC_PI(3,5)P2_4	NA	2107
BcrPH	B	0.1	PC_PI(3,5)P2_4	NA	2108
BcrPH	C	0.1	PC_PI(3,5)P2_4	NA	2109
BcrPH	A	5	PC_PI(3,5)P2_8	0.883	2007
BcrPH	B	5	PC_PI(3,5)P2_8	NA	2008
BcrPH	A	2	PC_PI(3,5)P2_8	0.864	2005
BcrPH	B	2	PC_PI(3,5)P2_8	1.05	2006
BcrPH	A	1	PC_PI(3,5)P2_8	NA	2002
BcrPH	B	1	PC_PI(3,5)P2_8	NA	2003
BcrPH	C	1	PC_PI(3,5)P2_8	0.381	2004
BcrPH	A	0.5	PC_PI(3,5)P2_8	NA	1999
BcrPH	B	0.5	PC_PI(3,5)P2_8	0.265	2000
BcrPH	C	0.5	PC_PI(3,5)P2_8	0.0432	2001
BcrPH	A	0.1	PC_PI(3,5)P2_8	0.00128	2107
BcrPH	B	0.1	PC_PI(3,5)P2_8	0.00133	2108
BcrPH	C	0.1	PC_PI(3,5)P2_8	0.00241	2109
BcrPH	A	5	PC_PI3P_10	0.227	2018
BcrPH	B	5	PC_PI3P_10	0.295	2019
BcrPH	C	5	PC_PI3P_10	0.054	2111
BcrPH	A	2	PC_PI3P_10	0.248	2016
BcrPH	B	2	PC_PI3P_10	0.211	2017
BcrPH	C	2	PC_PI3P_10	0.057	2112
BcrPH	A	1	PC_PI3P_10	0.11	2014
BcrPH	B	1	PC_PI3P_10	0.042	2015
BcrPH	C	1	PC_PI3P_10	0.017	2113
BcrPH	A	0.5	PC_PI3P_10	0.02	2012
BcrPH	B	0.5	PC_PI3P_10	0.017	2013
BcrPH	C	0.5	PC_PI3P_10	NA	2114
BcrPH	A	0.1	PC_PI3P_10	NA	2115
BcrPH	B	0.1	PC_PI3P_10	NA	2116
BcrPH	C	0.1	PC_PI3P_10	0.002	2117
BcrPH	A	5	PC_PI3P_2	0.011	2018
BcrPH	B	5	PC_PI3P_2	0.017	2019
BcrPH	C	5	PC_PI3P_2	0.03	2111
BcrPH	A	2	PC_PI3P_2	0.008	2016
BcrPH	B	2	PC_PI3P_2	0.014	2017
BcrPH	C	2	PC_PI3P_2	0.023	2112
BcrPH	A	1	PC_PI3P_2	0.008	2014
BcrPH	B	1	PC_PI3P_2	0.013	2015
BcrPH	C	1	PC_PI3P_2	0.004	2113
BcrPH	A	0.5	PC_PI3P_2	0.004	2012
BcrPH	B	0.5	PC_PI3P_2	0.003	2013
BcrPH	C	0.5	PC_PI3P_2	NA	2114
BcrPH	A	0.1	PC_PI3P_2	NA	2115
BcrPH	B	0.1	PC_PI3P_2	NA	2116
BcrPH	C	0.1	PC_PI3P_2	0.002	2117
BcrPH	A	5	PC_PI3P_4	0.096	2018
BcrPH	B	5	PC_PI3P_4	0.088	2019
BcrPH	C	5	PC_PI3P_4	0	2111
BcrPH	A	2	PC_PI3P_4	0.119	2016
BcrPH	B	2	PC_PI3P_4	0.034	2017
BcrPH	C	2	PC_PI3P_4	0	2112
BcrPH	A	1	PC_PI3P_4	0.03	2014
BcrPH	B	1	PC_PI3P_4	0.05	2015
BcrPH	C	1	PC_PI3P_4	0	2113
BcrPH	A	0.5	PC_PI3P_4	0.004	2012
BcrPH	B	0.5	PC_PI3P_4	0.007	2013
BcrPH	C	0.5	PC_PI3P_4	NA	2114
BcrPH	A	0.1	PC_PI3P_4	NA	2115
BcrPH	B	0.1	PC_PI3P_4	NA	2116
BcrPH	C	0.1	PC_PI3P_4	0	2117
BcrPH	A	5	PC_PI3P_8	0.077	2018
BcrPH	B	5	PC_PI3P_8	0.051	2019
BcrPH	C	5	PC_PI3P_8	0.101	2111
BcrPH	A	2	PC_PI3P_8	0.145	2016
BcrPH	B	2	PC_PI3P_8	0.058	2017
BcrPH	C	2	PC_PI3P_8	0.037	2112
BcrPH	A	1	PC_PI3P_8	0.022	2014
BcrPH	B	1	PC_PI3P_8	0.025	2015
BcrPH	C	1	PC_PI3P_8	0.008	2113
BcrPH	A	0.5	PC_PI3P_8	0.006	2012
BcrPH	B	0.5	PC_PI3P_8	0.005	2013
BcrPH	C	0.5	PC_PI3P_8	NA	2114
BcrPH	A	0.1	PC_PI3P_8	NA	2115
BcrPH	B	0.1	PC_PI3P_8	NA	2116
BcrPH	C	0.1	PC_PI3P_8	0.004	2117
BcrPH	A	5	PC_PI(4,5)P2_10	0.222	2007
BcrPH	B	5	PC_PI(4,5)P2_10	0.725	2008
BcrPH	A	2	PC_PI(4,5)P2_10	0.591	2005
BcrPH	B	2	PC_PI(4,5)P2_10	0.882	2006
BcrPH	A	1	PC_PI(4,5)P2_10	NA	2002
BcrPH	B	1	PC_PI(4,5)P2_10	0.0508	2003
BcrPH	C	1	PC_PI(4,5)P2_10	0.0234	2004
BcrPH	A	0.5	PC_PI(4,5)P2_10	0.169	1999
BcrPH	B	0.5	PC_PI(4,5)P2_10	0.0994	2000
BcrPH	C	0.5	PC_PI(4,5)P2_10	0.0413	2001
BcrPH	A	0.1	PC_PI(4,5)P2_10	0.00108	2107
BcrPH	B	0.1	PC_PI(4,5)P2_10	0.00263	2108
BcrPH	C	0.1	PC_PI(4,5)P2_10	0.0063	2109
BcrPH	A	5	PC_PI(4,5)P2_2	NA	2007
BcrPH	B	5	PC_PI(4,5)P2_2	0.777	2008
BcrPH	A	2	PC_PI(4,5)P2_2	0.983	2005
BcrPH	B	2	PC_PI(4,5)P2_2	0.437	2006
BcrPH	A	1	PC_PI(4,5)P2_2	NA	2002
BcrPH	B	1	PC_PI(4,5)P2_2	NA	2003
BcrPH	C	1	PC_PI(4,5)P2_2	NA	2004
BcrPH	A	0.5	PC_PI(4,5)P2_2	0.244	1999
BcrPH	B	0.5	PC_PI(4,5)P2_2	NA	2000
BcrPH	C	0.5	PC_PI(4,5)P2_2	0.065	2001
BcrPH	A	0.1	PC_PI(4,5)P2_2	0.00124	2107
BcrPH	B	0.1	PC_PI(4,5)P2_2	0.00177	2108
BcrPH	C	0.1	PC_PI(4,5)P2_2	0.0102	2109
BcrPH	A	5	PC_PI(4,5)P2_4	0.762	2007
BcrPH	B	5	PC_PI(4,5)P2_4	0.206	2008
BcrPH	A	2	PC_PI(4,5)P2_4	0.313	2005
BcrPH	B	2	PC_PI(4,5)P2_4	0.58	2006
BcrPH	A	1	PC_PI(4,5)P2_4	0.0275	2002
BcrPH	B	1	PC_PI(4,5)P2_4	0.356	2003
BcrPH	C	1	PC_PI(4,5)P2_4	0.509	2004
BcrPH	A	0.5	PC_PI(4,5)P2_4	NA	1999
BcrPH	B	0.5	PC_PI(4,5)P2_4	0.142	2000
BcrPH	C	0.5	PC_PI(4,5)P2_4	0.0157	2001
BcrPH	A	0.1	PC_PI(4,5)P2_4	0.00118	2107
BcrPH	B	0.1	PC_PI(4,5)P2_4	0.00147	2108
BcrPH	C	0.1	PC_PI(4,5)P2_4	0.00216	2109
BcrPH	A	5	PC_PI(4,5)P2_8	NA	2007
BcrPH	B	5	PC_PI(4,5)P2_8	0.739	2008
BcrPH	A	2	PC_PI(4,5)P2_8	0.436	2005
BcrPH	B	2	PC_PI(4,5)P2_8	0.771	2006
BcrPH	A	1	PC_PI(4,5)P2_8	0.366	2002
BcrPH	B	1	PC_PI(4,5)P2_8	0.0802	2003
BcrPH	C	1	PC_PI(4,5)P2_8	NA	2004
BcrPH	A	0.5	PC_PI(4,5)P2_8	0.267	1999
BcrPH	B	0.5	PC_PI(4,5)P2_8	0.0489	2000
BcrPH	C	0.5	PC_PI(4,5)P2_8	0.0656	2001
BcrPH	A	0.1	PC_PI(4,5)P2_8	0.00131	2107
BcrPH	B	0.1	PC_PI(4,5)P2_8	0.002	2108
BcrPH	C	0.1	PC_PI(4,5)P2_8	0.00379	2109
BcrPH	A	5	PC_PI5P_10	0.07	2018
BcrPH	B	5	PC_PI5P_10	0.052	2019
BcrPH	C	5	PC_PI5P_10	0.029	2111
BcrPH	A	2	PC_PI5P_10	0.236	2016
BcrPH	B	2	PC_PI5P_10	0.199	2017
BcrPH	C	2	PC_PI5P_10	0.022	2112
BcrPH	A	1	PC_PI5P_10	0.041	2014
BcrPH	B	1	PC_PI5P_10	0.031	2015
BcrPH	C	1	PC_PI5P_10	0.01	2113
BcrPH	A	0.5	PC_PI5P_10	0.009	2012
BcrPH	B	0.5	PC_PI5P_10	0.005	2013
BcrPH	C	0.5	PC_PI5P_10	NA	2114
BcrPH	A	0.1	PC_PI5P_10	NA	2115
BcrPH	B	0.1	PC_PI5P_10	NA	2116
BcrPH	C	0.1	PC_PI5P_10	0.004	2117
BcrPH	A	5	PC_PI5P_2	0.011	2018
BcrPH	B	5	PC_PI5P_2	0.027	2019
BcrPH	C	5	PC_PI5P_2	0.016	2111
BcrPH	A	2	PC_PI5P_2	0.014	2016
BcrPH	B	2	PC_PI5P_2	0.123	2017
BcrPH	C	2	PC_PI5P_2	0.014	2112
BcrPH	A	1	PC_PI5P_2	0.005	2014
BcrPH	B	1	PC_PI5P_2	0.013	2015
BcrPH	C	1	PC_PI5P_2	0.009	2113
BcrPH	A	0.5	PC_PI5P_2	0.005	2012
BcrPH	B	0.5	PC_PI5P_2	0.004	2013
BcrPH	C	0.5	PC_PI5P_2	NA	2114
BcrPH	A	0.1	PC_PI5P_2	NA	2115
BcrPH	B	0.1	PC_PI5P_2	NA	2116
BcrPH	C	0.1	PC_PI5P_2	0.004	2117
BcrPH	A	5	PC_PI5P_4	NA	2018
BcrPH	B	5	PC_PI5P_4	0.041	2019
BcrPH	C	5	PC_PI5P_4	0.05	2111
BcrPH	A	2	PC_PI5P_4	NA	2016
BcrPH	B	2	PC_PI5P_4	0.093	2017
BcrPH	C	2	PC_PI5P_4	0.024	2112
BcrPH	A	1	PC_PI5P_4	0.025	2014
BcrPH	B	1	PC_PI5P_4	0.019	2015
BcrPH	C	1	PC_PI5P_4	0.008	2113
BcrPH	A	0.5	PC_PI5P_4	0.009	2012
BcrPH	B	0.5	PC_PI5P_4	0.008	2013
BcrPH	C	0.5	PC_PI5P_4	NA	2114
BcrPH	A	0.1	PC_PI5P_4	NA	2115
BcrPH	B	0.1	PC_PI5P_4	NA	2116
BcrPH	C	0.1	PC_PI5P_4	0.006	2117
BcrPH	A	5	PC_PI5P_8	0.032	2018
BcrPH	B	5	PC_PI5P_8	0.022	2019
BcrPH	C	5	PC_PI5P_8	0.011	2111
BcrPH	A	2	PC_PI5P_8	NA	2016
BcrPH	B	2	PC_PI5P_8	0.03	2017
BcrPH	C	2	PC_PI5P_8	0.011	2112
BcrPH	A	1	PC_PI5P_8	0.017	2014
BcrPH	B	1	PC_PI5P_8	0.028	2015
BcrPH	C	1	PC_PI5P_8	0.007	2113
BcrPH	A	0.5	PC_PI5P_8	0.006	2012
BcrPH	B	0.5	PC_PI5P_8	0.004	2013
BcrPH	C	0.5	PC_PI5P_8	NA	2114
BcrPH	A	0.1	PC_PI5P_8	NA	2115
BcrPH	B	0.1	PC_PI5P_8	NA	2116
BcrPH	C	0.1	PC_PI5P_8	0.001	2117
BcrPH	A	5	PC_PS_10	0.069	2007
BcrPH	B	5	PC_PS_10	0.869	2008
BcrPH	C	5	PC_PS_10	0.222	2018
BcrPH	D	5	PC_PS_10	0.081	2019
BcrPH	E	5	PC_PS_10	0.06	2111
BcrPH	A	2	PC_PS_10	0.908	2005
BcrPH	B	2	PC_PS_10	0.356	2006
BcrPH	C	2	PC_PS_10	0.039	2016
BcrPH	D	2	PC_PS_10	NA	2017
BcrPH	E	2	PC_PS_10	NA	2112
BcrPH	A	1	PC_PS_10	0.00872	2002
BcrPH	B	1	PC_PS_10	0.338	2003
BcrPH	C	1	PC_PS_10	0.594	2004
BcrPH	D	1	PC_PS_10	0.037	2014
BcrPH	E	1	PC_PS_10	NA	2015
BcrPH	F	1	PC_PS_10	0.019	2113
BcrPH	A	0.5	PC_PS_10	0.242	1999
BcrPH	B	0.5	PC_PS_10	0.263	2000
BcrPH	C	0.5	PC_PS_10	0.0699	2001
BcrPH	D	0.5	PC_PS_10	0.078	2012
BcrPH	E	0.5	PC_PS_10	0.029	2013
BcrPH	F	0.5	PC_PS_10	NA	2114
BcrPH	A	0.1	PC_PS_10	0.00239	2107
BcrPH	B	0.1	PC_PS_10	0.00389	2108
BcrPH	C	0.1	PC_PS_10	0.00206	2109
BcrPH	D	0.1	PC_PS_10	NA	2115
BcrPH	E	0.1	PC_PS_10	NA	2116
BcrPH	F	0.1	PC_PS_10	0.003	2117
BcrPH	A	5	PC_LPA_10	0.512	2007
BcrPH	B	5	PC_LPA_10	0.00508	2008
BcrPH	C	5	PC_LPA_10	0.108	2018
BcrPH	D	5	PC_LPA_10	0.026	2019
BcrPH	E	5	PC_LPA_10	0.027	2111
BcrPH	A	2	PC_LPA_10	0.279	2005
BcrPH	B	2	PC_LPA_10	0.44	2006
BcrPH	C	2	PC_LPA_10	0.029	2016
BcrPH	D	2	PC_LPA_10	0.024	2017
BcrPH	E	2	PC_LPA_10	0.02	2112
BcrPH	A	1	PC_LPA_10	0.00274	2002
BcrPH	B	1	PC_LPA_10	0.302	2003
BcrPH	C	1	PC_LPA_10	NA	2004
BcrPH	D	1	PC_LPA_10	0.027	2014
BcrPH	E	1	PC_LPA_10	0.013	2015
BcrPH	F	1	PC_LPA_10	NA	2113
BcrPH	A	0.5	PC_LPA_10	0.00385	1999
BcrPH	B	0.5	PC_LPA_10	0.0785	2000
BcrPH	C	0.5	PC_LPA_10	0.0217	2001
BcrPH	D	0.5	PC_LPA_10	0.03	2012
BcrPH	E	0.5	PC_LPA_10	NA	2013
BcrPH	F	0.5	PC_LPA_10	NA	2114
BcrPH	A	0.1	PC_LPA_10	0.000886	2107
BcrPH	B	0.1	PC_LPA_10	0.00321	2108
BcrPH	C	0.1	PC_LPA_10	0.00109	2109
BcrPH	D	0.1	PC_LPA_10	NA	2115
BcrPH	E	0.1	PC_LPA_10	NA	2116
BcrPH	F	0.1	PC_LPA_10	0.002	2117
BcrPH	A	5	PC_LPC_10	0.0222	2007
BcrPH	B	5	PC_LPC_10	0.00751	2008
BcrPH	C	5	PC_LPC_10	0.014	2018
BcrPH	D	5	PC_LPC_10	0.012	2019
BcrPH	E	5	PC_LPC_10	0.052	2111
BcrPH	A	2	PC_LPC_10	0.0253	2005
BcrPH	B	2	PC_LPC_10	0.0197	2006
BcrPH	C	2	PC_LPC_10	0.007	2016
BcrPH	D	2	PC_LPC_10	0.031	2017
BcrPH	E	2	PC_LPC_10	0.019	2112
BcrPH	A	1	PC_LPC_10	0.00615	2002
BcrPH	B	1	PC_LPC_10	0.0921	2003
BcrPH	C	1	PC_LPC_10	NA	2004
BcrPH	D	1	PC_LPC_10	0.006	2014
BcrPH	E	1	PC_LPC_10	0.018	2015
BcrPH	F	1	PC_LPC_10	0.011	2113
BcrPH	A	0.5	PC_LPC_10	0.00109	1999
BcrPH	B	0.5	PC_LPC_10	0.043	2000
BcrPH	C	0.5	PC_LPC_10	0.0212	2001
BcrPH	D	0.5	PC_LPC_10	0.006	2012
BcrPH	E	0.5	PC_LPC_10	0.003	2013
BcrPH	F	0.5	PC_LPC_10	NA	2114
BcrPH	A	0.1	PC_LPC_10	0.00139	2107
BcrPH	B	0.1	PC_LPC_10	0.00255	2108
BcrPH	C	0.1	PC_LPC_10	0.00189	2109
BcrPH	D	0.1	PC_LPC_10	NA	2115
BcrPH	E	0.1	PC_LPC_10	NA	2116
BcrPH	F	0.1	PC_LPC_10	0.003	2117
BcrPH	A	5	PC_PI4P_10	0.109	2018
BcrPH	B	5	PC_PI4P_10	0.17	2019
BcrPH	C	5	PC_PI4P_10	0.193	2111
BcrPH	A	2	PC_PI4P_10	0.019	2016
BcrPH	B	2	PC_PI4P_10	0.08	2017
BcrPH	C	2	PC_PI4P_10	0.024	2112
BcrPH	A	1	PC_PI4P_10	0.019	2014
BcrPH	B	1	PC_PI4P_10	0.045	2015
BcrPH	C	1	PC_PI4P_10	0.019	2113
BcrPH	A	0.5	PC_PI4P_10	0.01	2012
BcrPH	B	0.5	PC_PI4P_10	0.008	2013
BcrPH	C	0.5	PC_PI4P_10	NA	2114
BcrPH	A	0.1	PC_PI4P_10	NA	2115
BcrPH	B	0.1	PC_PI4P_10	NA	2116
BcrPH	C	0.1	PC_PI4P_10	0.004	2117
BcrPH	A	5	PC_PI4P_2	0.05	2018
BcrPH	B	5	PC_PI4P_2	0.056	2019
BcrPH	C	5	PC_PI4P_2	NA	2111
BcrPH	A	2	PC_PI4P_2	0.041	2016
BcrPH	B	2	PC_PI4P_2	0.013	2017
BcrPH	C	2	PC_PI4P_2	0.012	2112
BcrPH	A	1	PC_PI4P_2	0.011	2014
BcrPH	B	1	PC_PI4P_2	0.017	2015
BcrPH	C	1	PC_PI4P_2	0.007	2113
BcrPH	A	0.5	PC_PI4P_2	0.021	2012
BcrPH	B	0.5	PC_PI4P_2	0.005	2013
BcrPH	C	0.5	PC_PI4P_2	NA	2114
BcrPH	A	0.1	PC_PI4P_2	NA	2115
BcrPH	B	0.1	PC_PI4P_2	NA	2116
BcrPH	C	0.1	PC_PI4P_2	0.003	2117
BcrPH	A	5	PC_PI4P_4	0.184	2018
BcrPH	B	5	PC_PI4P_4	0.158	2019
BcrPH	C	5	PC_PI4P_4	0.114	2111
BcrPH	A	2	PC_PI4P_4	0.064	2016
BcrPH	B	2	PC_PI4P_4	0.029	2017
BcrPH	C	2	PC_PI4P_4	0.066	2112
BcrPH	A	1	PC_PI4P_4	0.05	2014
BcrPH	B	1	PC_PI4P_4	0.03	2015
BcrPH	C	1	PC_PI4P_4	0.017	2113
BcrPH	A	0.5	PC_PI4P_4	0.015	2012
BcrPH	B	0.5	PC_PI4P_4	0.012	2013
BcrPH	C	0.5	PC_PI4P_4	NA	2114
BcrPH	A	0.1	PC_PI4P_4	NA	2115
BcrPH	B	0.1	PC_PI4P_4	NA	2116
BcrPH	C	0.1	PC_PI4P_4	0.001	2117
BcrPH	A	5	PC_PI4P_8	0.157	2018
BcrPH	B	5	PC_PI4P_8	0.17	2019
BcrPH	C	5	PC_PI4P_8	0.185	2111
BcrPH	A	2	PC_PI4P_8	0.136	2016
BcrPH	B	2	PC_PI4P_8	NA	2017
BcrPH	C	2	PC_PI4P_8	0.055	2112
BcrPH	A	1	PC_PI4P_8	0.032	2014
BcrPH	B	1	PC_PI4P_8	0.035	2015
BcrPH	C	1	PC_PI4P_8	0.029	2113
BcrPH	A	0.5	PC_PI4P_8	0.008	2012
BcrPH	B	0.5	PC_PI4P_8	0.01	2013
BcrPH	C	0.5	PC_PI4P_8	NA	2114
BcrPH	A	0.1	PC_PI4P_8	NA	2115
BcrPH	B	0.1	PC_PI4P_8	NA	2116
BcrPH	C	0.1	PC_PI4P_8	0.002	2117
BcrPH	A	5	PC_S1P_10	NA	2007
BcrPH	B	5	PC_S1P_10	0.0266	2008
BcrPH	C	5	PC_S1P_10	0.016	2018
BcrPH	D	5	PC_S1P_10	0.023	2019
BcrPH	E	5	PC_S1P_10	0.023	2111
BcrPH	A	2	PC_S1P_10	0.0123	2005
BcrPH	B	2	PC_S1P_10	0.0182	2006
BcrPH	C	2	PC_S1P_10	0.009	2016
BcrPH	D	2	PC_S1P_10	NA	2017
BcrPH	E	2	PC_S1P_10	0.022	2112
BcrPH	A	1	PC_S1P_10	NA	2002
BcrPH	B	1	PC_S1P_10	0.00909	2003
BcrPH	C	1	PC_S1P_10	NA	2004
BcrPH	D	1	PC_S1P_10	0.009	2014
BcrPH	E	1	PC_S1P_10	0.013	2015
BcrPH	F	1	PC_S1P_10	0.008	2113
BcrPH	A	0.5	PC_S1P_10	0.00509	1999
BcrPH	B	0.5	PC_S1P_10	0.00356	2000
BcrPH	C	0.5	PC_S1P_10	0.016	2001
BcrPH	D	0.5	PC_S1P_10	0.005	2012
BcrPH	E	0.5	PC_S1P_10	0.004	2013
BcrPH	F	0.5	PC_S1P_10	NA	2114
BcrPH	A	0.1	PC_S1P_10	0.00909	2107
BcrPH	B	0.1	PC_S1P_10	0.00431	2108
BcrPH	C	0.1	PC_S1P_10	0.00947	2109
BcrPH	D	0.1	PC_S1P_10	NA	2115
BcrPH	E	0.1	PC_S1P_10	NA	2116
BcrPH	F	0.1	PC_S1P_10	0.003	2117
DbsDHPH	A1	5	PC	0.00355	2083
DbsDHPH	A2	5	PC	0.0555	2083
DbsDHPH	A3	5	PC	0.00371	2083
DbsDHPH	B1	5	PC	0.0107	2084
DbsDHPH	B2	5	PC	0.0105	2084
DbsDHPH	B3	5	PC	NA	2084
DbsDHPH	C1	5	PC	0.015	2085
DbsDHPH	C2	5	PC	0.279	2085
DbsDHPH	C3	5	PC	0.00443	2085
DbsDHPH	D1	5	PC	0.001	2121
DbsDHPH	D2	5	PC	0.003	2121
DbsDHPH	D3	5	PC	0.002	2121
DbsDHPH	E1	5	PC	0.002	2122
DbsDHPH	E2	5	PC	0.002	2122
DbsDHPH	E3	5	PC	0.001	2122
DbsDHPH	F1	5	PC	0.002	2123
DbsDHPH	F2	5	PC	0.002	2123
DbsDHPH	F3	5	PC	0.004	2123
DbsDHPH	A1	2	PC	0.00373	2081
DbsDHPH	A2	2	PC	0.00414	2081
DbsDHPH	A3	2	PC	0.00249	2081
DbsDHPH	B1	2	PC	0.00199	2082
DbsDHPH	B2	2	PC	0.00447	2082
DbsDHPH	B3	2	PC	0.00424	2082
DbsDHPH	C1	2	PC	0.002	2124
DbsDHPH	C2	2	PC	0.003	2124
DbsDHPH	C3	2	PC	0.006	2124
DbsDHPH	D1	2	PC	0.01	2125
DbsDHPH	D2	2	PC	0.008	2125
DbsDHPH	D3	2	PC	0.004	2125
DbsDHPH	E1	2	PC	0.008	2126
DbsDHPH	E2	2	PC	0.003	2126
DbsDHPH	E3	2	PC	0.004	2126
DbsDHPH	A1	1	PC	0.00144	2078
DbsDHPH	A2	1	PC	0.163	2078
DbsDHPH	A3	1	PC	0.00215	2078
DbsDHPH	B1	1	PC	0.00183	2079
DbsDHPH	B2	1	PC	0.00227	2079
DbsDHPH	B3	1	PC	0.00174	2079
DbsDHPH	C1	1	PC	0.0015	2080
DbsDHPH	C2	1	PC	0.0025	2080
DbsDHPH	C3	1	PC	0.00153	2080
DbsDHPH	D1	1	PC	0.004	2127
DbsDHPH	D2	1	PC	0.004	2127
DbsDHPH	D3	1	PC	0.001	2127
DbsDHPH	E1	1	PC	0.003	2128
DbsDHPH	E2	1	PC	0.002	2128
DbsDHPH	E3	1	PC	0.002	2128
DbsDHPH	F1	1	PC	0.002	2129
DbsDHPH	F2	1	PC	NA	2129
DbsDHPH	F3	1	PC	NA	2129
DbsDHPH	A1	0.5	PC	0.00128	2075
DbsDHPH	A2	0.5	PC	0.00826	2075
DbsDHPH	A3	0.5	PC	0.00239	2075
DbsDHPH	B1	0.5	PC	0.00106	2076
DbsDHPH	B2	0.5	PC	0.0134	2076
DbsDHPH	B3	0.5	PC	0.00214	2076
DbsDHPH	C1	0.5	PC	0.00144	2077
DbsDHPH	C2	0.5	PC	0.00666	2077
DbsDHPH	C3	0.5	PC	0.00125	2077
DbsDHPH	D1	0.5	PC	0.003	2130
DbsDHPH	D2	0.5	PC	0.003	2130
DbsDHPH	D3	0.5	PC	0.003	2130
DbsDHPH	E1	0.5	PC	0.005	2131
DbsDHPH	E2	0.5	PC	0.003	2131
DbsDHPH	E3	0.5	PC	0.002	2131
DbsDHPH	F1	0.5	PC	0.002	2132
DbsDHPH	F2	0.5	PC	NA	2132
DbsDHPH	F3	0.5	PC	0.004	2132
DbsDHPH	A	5	PC_PA_10	0.00815	2083
DbsDHPH	B	5	PC_PA_10	0.0088	2084
DbsDHPH	C	5	PC_PA_10	0.00895	2085
DbsDHPH	D	5	PC_PA_10	0.007	2121
DbsDHPH	E	5	PC_PA_10	0.032	2122
DbsDHPH	F	5	PC_PA_10	0.01	2123
DbsDHPH	A	2	PC_PA_10	0.00832	2081
DbsDHPH	B	2	PC_PA_10	0.00532	2082
DbsDHPH	C	2	PC_PA_10	0.006	2124
DbsDHPH	D	2	PC_PA_10	0.016	2125
DbsDHPH	E	2	PC_PA_10	0.007	2126
DbsDHPH	A	1	PC_PA_10	0.00147	2078
DbsDHPH	B	1	PC_PA_10	0.00381	2079
DbsDHPH	C	1	PC_PA_10	0.00298	2080
DbsDHPH	D	1	PC_PA_10	0.002	2127
DbsDHPH	E	1	PC_PA_10	0.002	2128
DbsDHPH	F	1	PC_PA_10	0.007	2129
DbsDHPH	A	0.5	PC_PA_10	0.00178	2075
DbsDHPH	B	0.5	PC_PA_10	0.00213	2076
DbsDHPH	C	0.5	PC_PA_10	0.00165	2077
DbsDHPH	D	0.5	PC_PA_10	0.005	2130
DbsDHPH	E	0.5	PC_PA_10	0.004	2131
DbsDHPH	F	0.5	PC_PA_10	0.002	2132
DbsDHPH	A	5	PC_PE_10	0.0114	2083
DbsDHPH	B	5	PC_PE_10	NA	2084
DbsDHPH	C	5	PC_PE_10	0.00756	2085
DbsDHPH	D	5	PC_PE_10	0.003	2121
DbsDHPH	E	5	PC_PE_10	0.003	2122
DbsDHPH	F	5	PC_PE_10	0.002	2123
DbsDHPH	A	2	PC_PE_10	0.00409	2081
DbsDHPH	B	2	PC_PE_10	0.00342	2082
DbsDHPH	C	2	PC_PE_10	0.002	2124
DbsDHPH	D	2	PC_PE_10	0.005	2125
DbsDHPH	E	2	PC_PE_10	0.002	2126
DbsDHPH	A	1	PC_PE_10	0.0115	2078
DbsDHPH	B	1	PC_PE_10	0.00185	2079
DbsDHPH	C	1	PC_PE_10	0.00167	2080
DbsDHPH	D	1	PC_PE_10	0.002	2127
DbsDHPH	E	1	PC_PE_10	0.002	2128
DbsDHPH	F	1	PC_PE_10	NA	2129
DbsDHPH	A	0.5	PC_PE_10	0.00276	2075
DbsDHPH	B	0.5	PC_PE_10	0.0023	2076
DbsDHPH	C	0.5	PC_PE_10	0.00105	2077
DbsDHPH	D	0.5	PC_PE_10	0.004	2130
DbsDHPH	E	0.5	PC_PE_10	0.003	2131
DbsDHPH	F	0.5	PC_PE_10	0.003	2132
DbsDHPH	A	5	PC_PI_10	0.00778	2083
DbsDHPH	B	5	PC_PI_10	0.0031	2084
DbsDHPH	C	5	PC_PI_10	0.0202	2085
DbsDHPH	D	5	PC_PI_10	0.003	2121
DbsDHPH	E	5	PC_PI_10	0.003	2122
DbsDHPH	F	5	PC_PI_10	0.003	2123
DbsDHPH	A	2	PC_PI_10	0.00241	2081
DbsDHPH	B	2	PC_PI_10	0.00437	2082
DbsDHPH	C	2	PC_PI_10	NA	2124
DbsDHPH	D	2	PC_PI_10	0.011	2125
DbsDHPH	E	2	PC_PI_10	NA	2126
DbsDHPH	A	1	PC_PI_10	0.00222	2078
DbsDHPH	B	1	PC_PI_10	0.00348	2079
DbsDHPH	C	1	PC_PI_10	0.00175	2080
DbsDHPH	D	1	PC_PI_10	0.002	2127
DbsDHPH	E	1	PC_PI_10	0.002	2128
DbsDHPH	F	1	PC_PI_10	0.002	2129
DbsDHPH	A	0.5	PC_PI_10	0.00375	2075
DbsDHPH	B	0.5	PC_PI_10	0.00305	2076
DbsDHPH	C	0.5	PC_PI_10	0.00197	2077
DbsDHPH	D	0.5	PC_PI_10	0.004	2130
DbsDHPH	E	0.5	PC_PI_10	0.004	2131
DbsDHPH	F	0.5	PC_PI_10	0.003	2132
DbsDHPH	A	5	PC_PI(3,4,5)P3_10	NA	2083
DbsDHPH	B	5	PC_PI(3,4,5)P3_10	NA	2084
DbsDHPH	C	5	PC_PI(3,4,5)P3_10	NA	2085
DbsDHPH	A	2	PC_PI(3,4,5)P3_10	0.141	2081
DbsDHPH	B	2	PC_PI(3,4,5)P3_10	0.108	2082
DbsDHPH	A	1	PC_PI(3,4,5)P3_10	0.0172	2078
DbsDHPH	B	1	PC_PI(3,4,5)P3_10	0.0407	2079
DbsDHPH	C	1	PC_PI(3,4,5)P3_10	NA	2080
DbsDHPH	A	0.5	PC_PI(3,4,5)P3_10	NA	2075
DbsDHPH	B	0.5	PC_PI(3,4,5)P3_10	0.00467	2076
DbsDHPH	C	0.5	PC_PI(3,4,5)P3_10	0.00116	2077
DbsDHPH	A	5	PC_PI(3,4,5)P3_2	NA	2083
DbsDHPH	B	5	PC_PI(3,4,5)P3_2	NA	2084
DbsDHPH	C	5	PC_PI(3,4,5)P3_2	0.00715	2085
DbsDHPH	A	2	PC_PI(3,4,5)P3_2	0.00709	2081
DbsDHPH	B	2	PC_PI(3,4,5)P3_2	0.0055	2082
DbsDHPH	A	1	PC_PI(3,4,5)P3_2	0.012	2078
DbsDHPH	B	1	PC_PI(3,4,5)P3_2	0.00299	2079
DbsDHPH	C	1	PC_PI(3,4,5)P3_2	0.0088	2080
DbsDHPH	A	0.5	PC_PI(3,4,5)P3_2	0.00237	2075
DbsDHPH	B	0.5	PC_PI(3,4,5)P3_2	0.00381	2076
DbsDHPH	C	0.5	PC_PI(3,4,5)P3_2	0.000989	2077
DbsDHPH	A	5	PC_PI(3,4,5)P3_4	NA	2083
DbsDHPH	B	5	PC_PI(3,4,5)P3_4	0.111	2084
DbsDHPH	C	5	PC_PI(3,4,5)P3_4	0.0244	2085
DbsDHPH	A	2	PC_PI(3,4,5)P3_4	0.0679	2081
DbsDHPH	B	2	PC_PI(3,4,5)P3_4	0.0136	2082
DbsDHPH	A	1	PC_PI(3,4,5)P3_4	0.00977	2078
DbsDHPH	B	1	PC_PI(3,4,5)P3_4	0.00668	2079
DbsDHPH	C	1	PC_PI(3,4,5)P3_4	0.0172	2080
DbsDHPH	A	0.5	PC_PI(3,4,5)P3_4	NA	2075
DbsDHPH	B	0.5	PC_PI(3,4,5)P3_4	0.00476	2076
DbsDHPH	C	0.5	PC_PI(3,4,5)P3_4	0.00152	2077
DbsDHPH	A	5	PC_PI(3,4,5)P3_8	NA	2083
DbsDHPH	B	5	PC_PI(3,4,5)P3_8	NA	2084
DbsDHPH	C	5	PC_PI(3,4,5)P3_8	0.00872	2085
DbsDHPH	A	2	PC_PI(3,4,5)P3_8	0.0532	2081
DbsDHPH	B	2	PC_PI(3,4,5)P3_8	0.0808	2082
DbsDHPH	A	1	PC_PI(3,4,5)P3_8	0.0161	2078
DbsDHPH	B	1	PC_PI(3,4,5)P3_8	NA	2079
DbsDHPH	C	1	PC_PI(3,4,5)P3_8	0.0119	2080
DbsDHPH	A	0.5	PC_PI(3,4,5)P3_8	0.004	2075
DbsDHPH	B	0.5	PC_PI(3,4,5)P3_8	0.00438	2076
DbsDHPH	C	0.5	PC_PI(3,4,5)P3_8	0.00164	2077
DbsDHPH	A	5	PC_PI(3,4)P2_10	0.0686	2083
DbsDHPH	B	5	PC_PI(3,4)P2_10	0.0673	2084
DbsDHPH	C	5	PC_PI(3,4)P2_10	0.164	2085
DbsDHPH	A	2	PC_PI(3,4)P2_10	0.598	2081
DbsDHPH	B	2	PC_PI(3,4)P2_10	0.325	2082
DbsDHPH	A	1	PC_PI(3,4)P2_10	0.112	2078
DbsDHPH	B	1	PC_PI(3,4)P2_10	0.257	2079
DbsDHPH	C	1	PC_PI(3,4)P2_10	0.0834	2080
DbsDHPH	A	0.5	PC_PI(3,4)P2_10	0.0545	2075
DbsDHPH	B	0.5	PC_PI(3,4)P2_10	0.0477	2076
DbsDHPH	C	0.5	PC_PI(3,4)P2_10	0.00518	2077
DbsDHPH	A	5	PC_PI(3,4)P2_2	0.00455	2083
DbsDHPH	B	5	PC_PI(3,4)P2_2	0.00346	2084
DbsDHPH	C	5	PC_PI(3,4)P2_2	0.00337	2085
DbsDHPH	A	2	PC_PI(3,4)P2_2	0.0044	2081
DbsDHPH	B	2	PC_PI(3,4)P2_2	0.005	2082
DbsDHPH	A	1	PC_PI(3,4)P2_2	0.00265	2078
[truncated: 2,249 more rows]
